# Supplementary material for: C5-Amino acid functionalized LNA: positively poised for antisense applications
Source: Royal Society of Chemistry journal article supplement (doi:10.1039/c4cc03623a), 2014-01-01

## C5-Amino acid functionalized LNA: Positively poised for antisense applications

Dale C. Guenther, Pawan Kumar, Brooke A. Anderson and Patrick J. Hrdlicka\*

### Electronic Supplementary Information (ESI)

#### Table of Contents

|                                                                             |     |
|-----------------------------------------------------------------------------|-----|
| General experimental section                                                | S2  |
| Conjugation protocol toward nucleoside <b>3x/3y/3z</b>                      | S3  |
| General phosphorylation protocol for <b>4x/4y/4z</b>                        | S7  |
| General protocol for synthesis of modified ONs                              | S9  |
| Protocol - thermal denaturation studies                                     | S10 |
| MALDI-MS of synthesized ONs (Table S1)                                      | S10 |
| Representative thermal denaturation curves (Figure S1)                      | S11 |
| $T_m$ 's of duplexes between <b>B1-B4</b> -series towards DNA (Table S2)    | S11 |
| Thermodynamic parameters (Table S3)                                         | S12 |
| Thermostability toward RNA at various ionic strengths (Table S4)            | S13 |
| Thermostability toward DNA at various ionic strengths (Table S5, Figure S2) | S14 |
| Discrimination of mismatched DNA by <b>B1</b> -series (Table S6)            | S15 |
| Discrimination of mismatched RNA/DNA by <b>B4</b> -series (Table S7)        | S15 |
| Thermostability of ASO duplexes (Table S8)                                  | S16 |
| References                                                                  | S16 |
| NMR spectra of novel nucleosides                                            | S17 |

**General experimental section.** Analytical grade solvents and reagents were purchased from commercial suppliers and used without further purification. Anhydrous solvents were either purchased (DMF) or dried with activated molecular sieves: CH<sub>3</sub>CN (3 Å) and CH<sub>2</sub>Cl<sub>2</sub>/1,2-dichloroethane/*N,N'*-diisopropylethylamine (4 Å). Reactions using these solvents were conducted under an inert atmosphere (argon). All reactions were monitored by thin layer chromatography (TLC) using silica gel coated plates with a fluorescence indicator (SiO<sub>2</sub>-60, F-254), which were visualized under UV light and/or by dipping in 5% conc. H<sub>2</sub>SO<sub>4</sub> in abs. ethanol (v/v) followed by heating. Purification (>95% purity, assessed by one-dimensional NMR techniques) was accomplished using column chromatography (silica gel 60, particle size 0.040-0.063 mm) using moderate pressure (pressure ball). Evaporation of solvents was carried out under reduced pressure at temperatures below 40 °C. Chemical shifts are reported relative to deuterated solvents or other internal standards (trimethylsilane and 80% phosphoric acid for <sup>1</sup>H and <sup>31</sup>P NMR, respectively) or external standards (DMSO-*d*<sub>6</sub> and trifluorochloromethane for <sup>13</sup>C and <sup>19</sup>F NMR, respectively). Exchangeable protons were detected by disappearance of peaks upon D<sub>2</sub>O addition. Assignments of NMR spectra are based on 2D spectra (COSY, HSQC) and DEPT. Quaternary carbons in <sup>13</sup>C NMR are not assigned, but their presence was verified by HSQC and DEPT spectra (absence of signals). Assignments of <sup>1</sup>H NMR signals of H5'/H5''/CH<sub>2</sub>Ph and the corresponding <sup>13</sup>C NMR signals are interchangeable. MALDI-HRMS spectra were recorded on a Q-TOF mass spectrophotometer using 2,5-dihydroxybenzoic acid (DHB) as a matrix.

**(1R,3R,4R,7S)-3-[5-(3-Aminopropyn-1-yl)uracil-1-yl]-1-(4,4'-dimethoxytrityloxymethyl)-7-hydroxy-2,5-dioxabicyclo[2.2.1]heptane (2).**

*Method A.* Nucleoside **1**<sup>S1</sup> (1.28 g, 1.83 mmol) was dissolved in sat. methanolic ammonia (30 mL) and the mixture was stirred for 16 h at rt, at which point the solvents were evaporated. The resulting residue was purified by column chromatography (5-10% MeOH/CH<sub>2</sub>Cl<sub>2</sub>, v/v) to afford nucleoside **2** (1.11 g, 97%) as a brown foam, which was used in the next step without further purification. *R*<sub>f</sub> = 0.5 (10% MeOH in CH<sub>2</sub>Cl<sub>2</sub>, v/v); MALDI-HRMS *m/z* 634.2146 ([M+Na]<sup>+</sup>, C<sub>34</sub>H<sub>33</sub>N<sub>3</sub>O<sub>8</sub>·Na<sup>+</sup>, Calcd 634.2160); <sup>1</sup>H NMR (DMSO-*d*<sub>6</sub>, 500.1 MHz) δ 7.78 (s, 1H, H6), 7.43-7.46 (m, 2H, Ar), 7.30-7.36 (m, 6H, Ar), 7.23-7.27 (m, 1H, Ar), 6.91 (d, 4H, *J* = 9.0 Hz, Ar), 5.73 (br s, 1H, ex, 3'-OH), 5.42 (s, 1H, H1'), 4.25 (s, 1H, H2'), 4.07 (s, 1H, H3'), 3.78-3.80 (d, 1H, *J* = 8.0 Hz, H5''), 3.75-3.77 (d, 1H, *J* = 8.0 Hz, H5''), 3.75 (s, 6H, CH<sub>3</sub>O), 3.48-3.52 (d, 1H, *J* = 11.5 Hz, H5'), 3.28-3.33 (m, 3H, 2 × CH<sub>2</sub>NH<sub>2</sub>, H5' - partial overlap with H<sub>2</sub>O); <sup>13</sup>C NMR (DMSO-*d*<sub>6</sub>, 125.5 MHz) δ 161.8, 158.1, 149.0, 144.7, 141.1 (C6), 135.3, 135.1, 129.7 (Ar), 129.6 (Ar), 127.9 (Ar), 127.6 (Ar), 126.6 (Ar), 113.2 (Ar), 98.1, 93.6, 87.5, 86.9 (C1'), 85.6, 78.7 (C2'), 74.1, 71.3 (C5''), 69.5 (C3'), 58.9 (C5'), 55.0 (CH<sub>3</sub>O), 31.1 (CH<sub>2</sub>NH). Minor unidentified impurities were observed in the <sup>13</sup>C NMR spectrum below 40 ppm.

*Method B.* To a flame-dried round-bottomed flask was added 5-iodo-5'-*O*-(4,4'-dimethoxytrityl)-LNA uridine<sup>S1</sup> (2.00 g, 2.92 mmol), CuI (111 mg, 0.58 mmol), Pd(PPh<sub>3</sub>)<sub>4</sub> (0.34 g, 0.29 mmol) and anhydrous DMF (30 mL). Several degas/argon cycles were performed, followed by addition of propargyl amine (0.47 mL, 7.31 mmol) and anhydrous Et<sub>3</sub>N (1.80 mL, 12.90 mmol). The reaction mixture was stirred at room

temperature under argon atmosphere for 15.5 h, at which point the solvent was evaporated off at high vacuum. The resulting residue was diluted with CH<sub>2</sub>Cl<sub>2</sub> (60 mL), washed with brine (2 × 100 mL), sat. aq. NaHCO<sub>3</sub> (100 mL), and H<sub>2</sub>O (100 mL). The organic layer was evaporated to dryness and the resulting crude was purified via silica gel column chromatography (0-10% MeOH in CH<sub>2</sub>Cl<sub>2</sub>, v/v) to give nucleoside **2** (1.27 g, 71%) as a light brown foam.<sup>S2</sup>

**Conjugation protocol for the synthesis of nucleosides 3x/3y/3z.** Protected amino acids 2-(2,2,2-trifluoroacetamido)acetic acid and (*S*)-2,6-bis(2,2,2-trifluoroacetamido)hexanoic acid were prepared according to literature protocols.<sup>S3</sup> *S*-2-(2,2,2-Trifluoroacetamido)-4-methylpentanoic acid was also prepared essentially as described in the literature,<sup>S4</sup> except that sodium in methanol (0 °C), rather than potassium in methanol (40 °C), was used to generate methoxide. A solution of the appropriate protected amino acid, *O*-(*N*-succinimidyl)-1,1,3,3-tetramethyluronium tetrafluoroborate (TSTU) and *N,N'*-diisopropylethylamine (DIPEA) in anhydrous DMF was stirred at rt for 30 min. After cooling the solution to 0 °C, nucleoside **2** was added and the reaction mixture was warmed to rt over 15 min. Upon completion of the reaction (reaction time specified below) the solvent was evaporated and the resulting residue dissolved in EtOAc (100 mL). The organic phase was sequentially washed with sat. aq. NaHCO<sub>3</sub> (2 × 50 mL) and brine (50 mL), dried (Na<sub>2</sub>SO<sub>4</sub>) and evaporated to dryness. The resulting residue was purified by silica gel column chromatography (0-5% MeOH in CH<sub>2</sub>Cl<sub>2</sub>, v/v) to afford desired nucleoside **3x/y/z** (quantities and yields specified below).

**5-(TFA-glycyl-aminopropynyl)-5'-O-(4,4'-dimethoxytrityl) LNA uridine (3x).** A solution of 2-(2,2,2-trifluoroacetamido)acetic acid (90 mg, 0.58 mmol), nucleoside **2** (0.30 g, 0.49 mmol), TSTU (190 mg, 0.63 mmol) and DIPEA (0.25 mL, 1.47 mmol) in anhydrous DMF (10 mL) was reacted (2 h), worked up and purified as described in the representative protocol to afford nucleoside **3x** (180 mg, 48%) as a slightly brown solid material.  $R_f = 0.4$  (5% MeOH in  $\text{CH}_2\text{Cl}_2$ , v/v); MALDI-HRMS  $m/z$  787.2200 ( $[\text{M} + \text{Na}]^+$ ,  $\text{C}_{38}\text{H}_{35}\text{F}_3\text{N}_4\text{O}_{10}\cdot\text{Na}^+$ , Calcd 787.2203);  $^1\text{H}$  NMR (DMSO- $d_6$ , 500.1 MHz)  $\delta$  11.68 (s, 1H, ex, NH(U)), 9.62 (t, 1H, ex,  $J = 5.5$  Hz,  $\text{NHCOCF}_3$ ), 8.49 (t, 1H, ex,  $J = 5.2$  Hz,  $\text{NHCH}_2\text{C}\equiv\text{C}$ ), 7.78 (s, 1H, H6), 7.42-7.45 (m, 2H, Ar), 7.28-7.35 (m, 6H, Ar), 7.23-7.27 (m, 1H, Ar), 6.91-6.92 (2d, 4H,  $J = 9.0$  Hz, Ar), 5.73 (d, 1H, ex,  $J = 5.0$  Hz, 3'-OH), 5.43 (s, 1H, H1'), 4.25 (s, 1H, H2'), 4.04 (d, 1H,  $J = 5.0$  Hz, H3'), 3.94-3.99 (dd, 1H,  $J = 17.7$  Hz, 5.2 Hz,  $\text{CH}_2\text{C}\equiv\text{C}$ ), 3.86-3.91 (dd, 2H,  $J = 17.7, 5.2$  Hz,  $\text{CH}_2\text{C}\equiv\text{C}$ ), 3.79-3.83 (m, 4H, H5'',  $\text{CH}_2\text{NHCOCF}_3$ ), 3.75 (s, 6H,  $\text{CH}_3\text{O}$ ), 3.55-3.58 (d, 1H,  $J = 11.0$  Hz, H5'), 3.26-3.30 (d, 1H,  $J = 11.0$  Hz, H5', partial overlap with  $\text{H}_2\text{O}$ );  $^{13}\text{C}$  NMR (DMSO- $d_6$ , 125.5 MHz)  $\delta$  166.6, 161.7, 158.12, 158.08, 156.7 (q,  $J_{\text{CF}} = 36$  Hz,  $\text{COCF}_3$ ), 149.0, 144.7, 141.8 (C6), 135.4, 134.9, 129.8 (Ar), 129.6 (Ar), 127.9 (Ar), 127.5 (Ar), 126.7 (Ar), 115.9 (q,  $J_{\text{CF}} = 287$  Hz,  $\text{CF}_3$ ), 113.3 (Ar), 113.2 (Ar), 97.5, 88.8, 87.6, 86.9 (C1'), 85.6, 78.8 (C2'), 74.7, 71.4 (C5''), 69.6 (C3'), 59.1 (C5'), 55.0 ( $\text{CH}_3\text{O}$ ), 41.7 ( $\text{CH}_2\text{NHCOCF}_3$ ), 28.8 ( $\text{CH}_2\text{C}\equiv\text{C}$ );  $^{19}\text{F}$  NMR (DMSO- $d_6$ , 470.6 MHz)  $\delta$  -74.8 ( $\text{CF}_3$ ).

**5-(TFA-leucyl-aminopropynyl)-5'-O-(4,4'-dimethoxytrityl) LNA uridine (3y).** A solution of *S*-2-(2,2,2-trifluoroacetamido)-4-methylpentanoic acid (100 mg, 0.44 mmol), nucleoside **2** (0.25 g, 0.40 mmol), TSTU (160 mg, 0.53 mmol) and DIPEA (0.21 mL, 1.20 mmol) in anhydrous DMF (5 mL) was reacted (2 h), worked up and purified as

described in the representative protocol to afford nucleoside **3y** (170 mg, 49%) as a brown solid material.  $R_f = 0.5$  (5% MeOH in  $\text{CH}_2\text{Cl}_2$ , v/v); MALDI-HRMS  $m/z$  843.2797 ( $[\text{M} + \text{Na}]^+$ ,  $\text{C}_{42}\text{H}_{43}\text{F}_3\text{N}_4\text{O}_{10}\cdot\text{Na}^+$ , Calcd 843.2829);  $^1\text{H}$  NMR ( $\text{DMSO-}d_6$ , 500.1 MHz)  $\delta$  11.68 (s, 1H, ex, NH(U)), 9.54 (d, 1H, ex,  $J = 8.5$  Hz,  $\text{NHCOCF}_3$ ), 8.58-8.61 (m, 1H, ex,  $\text{NHCH}_2\text{C}\equiv\text{C}$ ), 7.77 (s, 1H, H6), 7.42-7.45 (m, 2H, Ar), 7.28-7.35 (m, 6H, Ar), 7.22-7.26 (m, 1H, Ar), 6.89-6.93 (2d, 4H,  $J = 9.0$  Hz, Ar), 5.71-5.74 (d, 1H, ex,  $J = 8.5$  Hz, 3'-OH – partial overlap with  $\text{CH}_2\text{Cl}_2$ ), 5.43 (s, 1H, H1'), 4.35-4.41 (m, 1H,  $\text{CHNHCOCF}_3$ ), 4.25 (s, 1H, H2'), 4.02-4.05 (m, 1H, H3'), 3.85-3.99 (m, 2H,  $\text{CH}_2\text{C}\equiv\text{C}$ ), 3.78-3.83 (m, 2H, H5''), 3.75 (s, 6H,  $\text{CH}_3\text{O}$ ), 3.54-3.58 (d, 1H,  $J = 11.0$  Hz, H5'), 3.26-3.30 (d, 1H,  $J = 11.0$  Hz, H5' - partial overlap with  $\text{H}_2\text{O}$ ), 1.63-1.66 (m, 1H,  $\text{CH}_2$ -*i*Pr), 1.45-1.54 (m, 2H,  $\text{CH}_2$ -*i*Pr,  $\text{CH}(\text{CH}_3)_2$ ), 0.81-0.89 (m, 6H,  $(\text{CH}_3)_2\text{CH}$ );  $^{13}\text{C}$  NMR ( $\text{DMSO-}d_6$ , 125.5 MHz) 170.1, 161.7, 158.12, 158.08, 156.3 (q,  $^2J_{\text{CF}} = 36$  Hz,  $\text{COCF}_3$ ), 149.0, 144.7, 141.8 (C6), 135.42, 135.40, 134.91, 134.87, 129.8 (Ar), 129.6 (Ar), 127.9 (Ar), 127.5 (Ar), 126.7 (Ar), 115.8 (q,  $^1J_{\text{CF}} = 288$  Hz,  $\text{CF}_3$ ), 113.2 (Ar), 97.6, 88.9, 87.5, 86.9 (C1'), 85.6, 78.8 (C2'), 74.7, 71.4 (C5''), 69.6 (C3'), 59.1 (C5'), 55.0 ( $\text{CH}_3\text{O}$ ), 51.5 ( $\text{CHNHCOCF}_3$ ), 39.7 ( $\text{CH}_2$ -*i*Pr – overlap with  $\text{DMSO-}d_6$ ), 28.9 ( $\text{CH}_2\text{C}\equiv\text{C}$ ), 24.3 ( $\text{CHMe}_2$ ), 22.9 ( $\text{CH}_3$ ), 21.0 ( $\text{CH}_3$ );  $^{19}\text{F}$  NMR ( $\text{DMSO-}d_6$ , 282.4 MHz)  $\delta$  -74.3. An extra set of  $^{13}\text{C}$  NMR signals are observed for some of the carbons (extra signals at 88.8, 74.8, 59.0, 24.2, 22.8, 20.9 ppm). We attribute these peaks to the presence of two different conformers, most likely rotamers – rather than scrambling of the chirality center in the amino acid residue – based on the observation that only one set of signals is observed when the spectrum is recorded in acetone- $d_6$ .

**5-(bis-TFA-lysyl-aminopropynyl)-5'-O-(4,4'-dimethoxytrityl) LNA uridine (3z).** A solution of (*S*)-2,6-bis(2,2,2-trifluoroacetamido)hexanoic acid (0.27 g, 0.79 mmol), nucleoside **2** (0.50 g, 0.81 mmol), TSTU (0.32 g, 1.06 mmol) and DIPEA (0.42 mL, 2.40 mmol) in anhydrous DMF (10 mL) was reacted (3h), worked up and purified as described in the representative protocol to afford nucleoside **3z** (0.44 g, 58%) as a slightly brown solid material.  $R_f = 0.5$  (5% MeOH in  $\text{CH}_2\text{Cl}_2$ , v/v); MALDI-HRMS  $m/z$  954.2770 ( $[\text{M} + \text{Na}]^+$ ,  $\text{C}_{44}\text{H}_{43}\text{F}_6\text{N}_5\text{O}_{11}\cdot\text{Na}^+$ , Calcd 954.2761);  $^1\text{H}$  NMR (DMSO- $d_6$ , 500.1 MHz)  $\delta$  11.68 (s, 1H, ex, NH), 9.50 (d, 1H, ex,  $J = 7.0$  Hz, NHCH), 9.36 (br s, 1H, ex,  $\text{NH}(\text{CF}_3\text{CO})\text{CH}_2$ ), 8.55 (br s, 1H, ex,  $\text{NHCH}_2\text{C}\equiv\text{C}$ ), 7.78 (s, 1H, H6), 7.42-7.45 (m, 2H, Ar), 7.28-7.35 (m, 6H, Ar), 7.22-7.26 (m, 1H, Ar), 6.88-6.93 (2d, 4H,  $J = 9.0$  Hz, Ar), 5.72 (d, 1H, ex,  $J = 5.0$  Hz, 3'-OH), 5.42 (ap d, 1H,  $J = 3.5$  Hz, H1'), 4.27-4.32 (m, 1H, CHNH), 4.25 (s, 1H, H2'), 4.03 (ap t, 1H,  $J = 5.0$  Hz, H3'), 3.78-3.98 (m, 4H,  $\text{CH}_2\text{C}\equiv\text{C}$ , H5''), 3.74 (s, 6H,  $\text{CH}_3\text{O}$ ), 3.55-3.58 (d, 1H,  $J = 11.5$  Hz, H5'), 3.26-3.29 (d, 1H,  $J = 11.5$  Hz, H5'), 3.09-3.20 (m, 2H,  $\text{CH}_2\text{CH}_2\text{CH}_2\text{CH}_2\text{CHNH}$ ), 1.65-1.74 (m, 2H,  $\text{CH}_2\text{CHNH}$ ), 1.41-1.49 (m, 2H,  $\text{CH}_2\text{CH}_2\text{CH}_2\text{CHNH}$ ), 1.18-1.32 (m, 2H,  $\text{CH}_2\text{CH}_2\text{CHNH}$ );  $^{13}\text{C}$  NMR (DMSO- $d_6$ , 125.5 MHz)  $\delta$  169.8, 161.7, 158.12, 158.08, 156.4 (2q,  $^2J_{\text{CF}} = 36$  Hz,  $2\times\text{COCF}_3$ ), 149.0, 144.7, 141.80, 141.78 (C6), 135.42, 135.39, 134.91, 134.88, 129.8 (Ar), 129.6 (Ar), 127.9 (Ar), 127.5 (Ar), 126.6 (Ar), 115.9 (q,  $^1J_{\text{CF}} = 286$  Hz,  $\text{CF}_3$ ), 115.7 (q,  $^1J_{\text{CF}} = 290$  Hz,  $\text{CF}_3$ ), 113.2 (Ar), 97.54, 97.53, 88.81, 88.75, 87.5, 86.9 (C1'), 85.6, 78.8 (C2'), 74.84, 74.79, 71.4 (C5''), 69.6 (C3'), 59.1 (C5'), 59.0 (C5'), 54.9 ( $\text{CH}_3\text{O}$ ), 53.0 (CHNH), 38.9 ( $\text{CH}_2\text{CH}_2\text{CH}_2\text{CH}_2\text{CHNH}$ ), 30.5 ( $\text{CH}_2\text{CHNH}$ ), 28.9 ( $\text{CH}_2\text{C}\equiv\text{C}$ ), 27.6 ( $\text{CH}_2\text{CH}_2\text{CH}_2\text{CHNH}$ ), 22.7 ( $\text{CH}_2\text{CH}_2\text{CHNH}$ );  $^{19}\text{F}$  NMR (DMSO- $d_6$ , 282.4 MHz)  $\delta$  -74.3, -74.9. An extra set of  $^{13}\text{C}$  NMR signals is observed for some of the carbons, which we

again attribute to the presence of two different conformers/rotamers (extra signals at ~ 141.8, 97.5, 88.8, 74.8 and 59.1 ppm – all belong to carbons in the (anticipated spatial) vicinity of the amino acid residue).

**General phosphitylation protocol for the preparation of 4x/y/z.** The appropriate nucleoside **3** was coevaporated with anhydrous 1,2-dichloroethane ( $2 \times 10$  mL) and dissolved in anhydrous  $\text{CH}_2\text{Cl}_2$ . DIPEA was added to this solution followed by dropwise addition of 2-cyanoethyl *N,N*-diisopropylchlorophosphoramidite (PCI reagent). The reaction was stirred at rt for 2 h, at which point ice cold ethanol (1 mL) was added and the solvents were evaporated. The resulting residue was purified by silica gel column chromatography (typically 0-5% MeOH/ $\text{CH}_2\text{Cl}_2$ , v/v) and subsequent trituration from  $\text{CH}_2\text{Cl}_2$  and petroleum ether to provide phosphoramidites **4x/y/z**.

**5-(TFA-glycyl-aminopropynyl)-5'-O-(4,4'-dimethoxytrityl)-3'-O-(*N,N*-diisopropylamino-2-cyanoethoxyphosphinyl) LNA uridine (4x).** A solution of nucleoside **3x** (146 mg, 0.19 mmol), DIPEA (137  $\mu\text{L}$ , 0.78 mmol) and PCI reagent (66  $\mu\text{L}$ , 0.29 mmol) in anhydrous  $\text{CH}_2\text{Cl}_2$  (4 mL) was reacted and purified as described above to afford phosphoramidite **4x** (119 mg, 64%) as a white foam.  $R_f = 0.3$  (5% MeOH in  $\text{CH}_2\text{Cl}_2$ , v/v); MALDI-HRMS  $m/z$  987.3279 ( $[\text{M} + \text{Na}]^+$ ,  $\text{C}_{47}\text{H}_{52}\text{F}_3\text{N}_6\text{O}_{11}\text{P}\cdot\text{Na}^+$ , Calcd 987.3282);  $^{31}\text{P}$  NMR ( $\text{CDCl}_3$ , 121.5 MHz)  $\delta$  149.9, 148.8.

**5-(TFA-leucyl-aminopropynyl)-5'-O-(4,4'-dimethoxytrityl)-3'-O-(*N,N*-diisopropylamino-2-cyanoethoxyphosphinyl) LNA uridine (4y).** A solution of



nucleoside **3y** (83 mg, 0.10 mmol), DIPEA (71  $\mu$ L, 0.41 mmol) and PCl reagent (41  $\mu$ L, 0.18 mmol) in anhydrous CH<sub>2</sub>Cl<sub>2</sub> (4 mL) was reacted and purified as described above to afford phosphoramidite **4y** as a light yellow foam (38 mg, 37% yield).  $R_f = 0.3$  (5% MeOH in CH<sub>2</sub>Cl<sub>2</sub>, v/v); MALDI-HRMS  $m/z$  1043.3889 ( $[M + Na]^+$ , C<sub>51</sub>H<sub>60</sub>F<sub>3</sub>N<sub>6</sub>O<sub>11</sub>P·Na<sup>+</sup>, Calcd 1043.3908); <sup>31</sup>P NMR (CDCl<sub>3</sub>, 121.5 MHz)  $\delta$  149.8, 148.8.

**5-(TFA-lysyl-aminopropynyl)-5'-O-(4,4'-dimethoxytrityl)-3'-O-(*N,N*-**

**diisopropylamino-2-cyanoethoxyphosphinyl) LNA uridine (**4z**).** A solution of nucleoside **3z** (154 mg, 0.16 mmol), DIPEA (112  $\mu$ L, 0.65 mmol) and PCl-reagent (72  $\mu$ L, 0.32 mmol) in anhydrous CH<sub>2</sub>Cl<sub>2</sub> (4 mL) was reacted and purified as described above to afford phosphoramidite **4z** (83 mg, 45%) as a light yellow foam.  $R_f = 0.4$  (5% MeOH in CH<sub>2</sub>Cl<sub>2</sub>, v/v); MALDI-HRMS  $m/z$  1154.3789 ( $[M + Na]^+$ , C<sub>53</sub>H<sub>60</sub>F<sub>6</sub>N<sub>7</sub>O<sub>12</sub>P·Na<sup>+</sup>, Calcd 1154.3840); <sup>31</sup>P NMR (DMSO-*d*<sub>6</sub>, 121.5 MHz)  $\delta$  148.4, 147.9.

**General protocol for the synthesis of modified ONs.** ASO **L1** was obtained from a commercial vendor. All other modified ONs were synthesized on an automated DNA synthesizer (0.2  $\mu$ mol scale) and using long-chain alkyl amine controlled pore glass (LCAA-CPG) solid support. Modified phosphoramidites (0.05 M in acetonitrile) were used to incorporate monomers **X-Z**. Extended hand couplings (15 min, 4,5-dicyanoimidazole), oxidation (60 s) and capping (30 s) were employed resulting in stepwise coupling yield of 99, 93, and 90% for phosphoramidites **4x**, **4y** and **4z**, respectively. ONs were deprotected and cleaved from solid support using ammonia (55 °C, 17 h), purified in the DMT-ON mode using reverse-phase ion-pair HPLC (0.05 M aq.

triethyl ammonium acetate / 25% water in CH<sub>3</sub>CN), detritylated (80% aq. AcOH) and precipitated (NaOAc/NaClO<sub>4</sub>/acetone, -18 °C for 12-16 h). Purity (>80%) and identity was verified by analytical HPLC and MALDI-TOF, respectively. Quantification of ONs was performed using extinction coefficients (OD<sub>260</sub>/μmol) of 12.01 (G), 15.2 (A), 7.05 (C), and 8.40 (T).

**Protocol – thermal denaturation studies.** Thermal denaturation curves were recorded and analyzed as previously described. The two strands comprising a duplex were annealed (each at 1.0 μM, 85 °C, 2 min) in a medium salt phosphate buffer ([Na<sup>+</sup>] = 110 mM, [Cl<sup>-</sup>] = 100 mM, pH 7.0 (NaH<sub>2</sub>PO<sub>4</sub>/Na<sub>2</sub>HPO<sub>4</sub>)), unless otherwise specified. A temperature ramp of 0.5 °C/min was used in all experiments. The reported *T<sub>m</sub>* is the maximum of the first derivative curve, rounded to the nearest 0.5 °C, averaged from two experiments within 1.0 °C.

**Table S1.** MALDI-MS of synthesized ONs.<sup>a</sup>

| ON            | Sequence                                                             | Calculated <i>m/z</i> [M] <sup>+</sup> | Observed <i>m/z</i> [M] <sup>+</sup> |
|---------------|----------------------------------------------------------------------|----------------------------------------|--------------------------------------|
| <b>X1</b>     | 5'-GTG AXA TGC                                                       | 2876.5                                 | 2877.7                               |
| <b>X2</b>     | 3'-CAC XAT ACG                                                       | 2805.5                                 | 2806.6                               |
| <b>X3</b>     | 3'-CAC TAX ACG                                                       | 2805.5                                 | 2806.6                               |
| <b>X4</b>     | 3'-CAC XAX ACG                                                       | 2929.6                                 | 2930.5                               |
| <b>Y1</b>     | 5'-GTG AYA TGC                                                       | 2932.6                                 | 2933.6                               |
| <b>Y2</b>     | 3'-CAC YAT ACG                                                       | 2861.6                                 | 2862.6                               |
| <b>Y3</b>     | 3'-CAC TAY ACG                                                       | 2861.6                                 | 2862.0                               |
| <b>Y4</b>     | 3'-CAC YAY ACG                                                       | 3041.7                                 | 3042.1                               |
| <b>Z1</b>     | 5'-GTG AZA TGC                                                       | 2947.6                                 | 2948.7                               |
| <b>Z2</b>     | 3'-CAC ZAT ACG                                                       | 2876.6                                 | 2877.8                               |
| <b>Z3</b>     | 3'-CAC TAZ ACG                                                       | 2876.6                                 | 2877.7                               |
| <b>Z4</b>     | 3'-CAC ZAZ ACG                                                       | 3071.7                                 | 3072.6                               |
| <b>ASO Z1</b> | 5'- <u>Z<sub>cg</sub></u> AAG TAC TCG GCG TA <sub>g</sub> <u>gZT</u> | 7309.8                                 | 7310.0                               |

<sup>a</sup> Structures of monomers X/Y/Z are shown in Scheme 1 in the main text. Lower case letters denote canonical LNA monomers; underlined denotes phosphorothioate backbone.

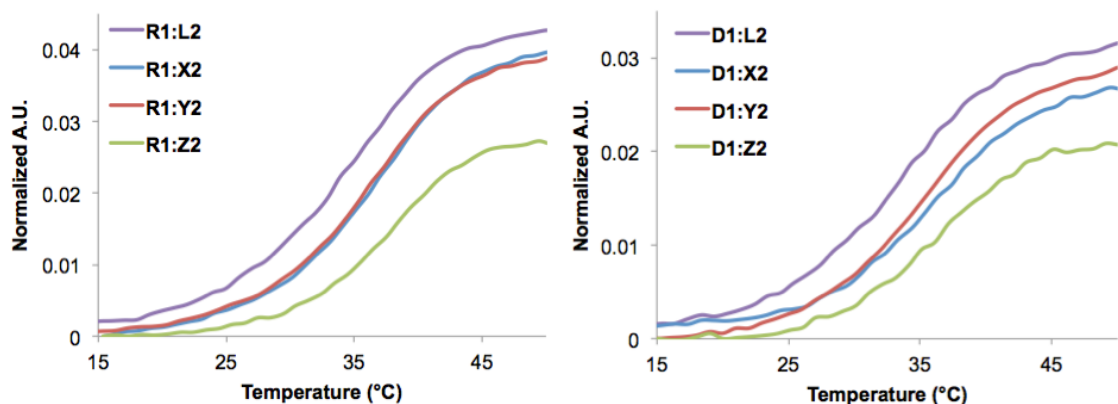

**Figure S1.** Representative thermal denaturation curves for the B2-series (3'-CAC TAB ACG). For monomer structures, see Scheme 1.

**Table S2.**  $T_m$ 's of duplexes between **B1-B4** -series and complementary DNA targets.<sup>a</sup>

| ON        | Duplex                  | <b>B</b> = | $T_m$ [ $\Delta T_m$ /mod]/°C |        |        |        |
|-----------|-------------------------|------------|-------------------------------|--------|--------|--------|
|           |                         |            | L                             | X      | Y      | Z      |
| <b>B1</b> | 5'-GTG <b>ABA</b> TGC   |            | 36.0                          | 37.5   | 36.5   | 38.5   |
| <b>D2</b> | 3'-CAC TAT ACG          |            | [+6.5]                        | [+8.0] | [+7.0] | [+9.0] |
| <b>D1</b> | 5'-GTG ATA TGC          |            | 34.0                          | 36.0   | 36.5   | 39.0   |
| <b>B2</b> | 3'-CAC <b>BAT</b> ACG   |            | [+4.5]                        | [+6.5] | [+7.0] | [+9.5] |
| <b>D1</b> | 5'-GTG ATA TGC          |            | 36.5                          | 38.0   | 37.0   | 37.0   |
| <b>B3</b> | 3'-CAC TAB <b>B</b> ACG |            | [+7.0]                        | [+8.5] | [+7.5] | [+7.5] |
| <b>D1</b> | 5'-GTG ATA TGC          |            | 39.0                          | 46.0   | 44.5   | 49.0   |
| <b>B4</b> | 3'-CAC <b>BAB</b> ACG   |            | [+4.8]                        | [+8.3] | [+7.5] | [+9.8] |

<sup>a</sup> For monomer structures, see Scheme 1.  $\Delta T_m$  = change in  $T_m$  relative to unmodified **D1:D2** duplex (29.5 °C).

**Table S3.** Thermodynamic parameters for duplex formation between **B1-B3**-series and complementary RNA or DNA.<sup>a</sup>

| ON        | Sequence                | complementary RNA                                       |                                             |                                                                  | complementary DNA                                       |                                             |                                                                  |
|-----------|-------------------------|---------------------------------------------------------|---------------------------------------------|------------------------------------------------------------------|---------------------------------------------------------|---------------------------------------------|------------------------------------------------------------------|
|           |                         | $\Delta G^{298}$ [ $\Delta\Delta G^{298}$ ]<br>(kJ/mol) | $\Delta H$ [ $\Delta\Delta H$ ]<br>(kJ/mol) | $-T^{298}\Delta S$<br>[ $\Delta(-T^{298}\Delta S)$ ]<br>(kJ/mol) | $\Delta G^{298}$ [ $\Delta\Delta G^{298}$ ]<br>(kJ/mol) | $\Delta H$ [ $\Delta\Delta H$ ]<br>(kJ/mol) | $-T^{298}\Delta S$<br>[ $\Delta(-T^{298}\Delta S)$ ]<br>(kJ/mol) |
| <b>D1</b> | 5'-GTG ATA TGC          | -36                                                     | -278                                        | 241                                                              | -42                                                     | -314                                        | 271                                                              |
| <b>D2</b> | 3'-CAC TAT ACG          | -39                                                     | -293                                        | 254                                                              | -42                                                     | -314                                        | 271                                                              |
| <b>L1</b> | 5'-GTG A <u>L</u> A TGC | -49 [-13]                                               | -309 [-31]                                  | 260 [+19]                                                        | -47 [-5]                                                | -297 [+17]                                  | 250 [-21]                                                        |
| <b>L2</b> | 3'-CAC <u>L</u> AT ACG  | -47 [-8]                                                | -331 [-38]                                  | 283 [+29]                                                        | -46 [-4]                                                | -332 [-18]                                  | 286 [+15]                                                        |
| <b>L3</b> | 3'-CAC TA <u>L</u> ACG  | -50 [-11]                                               | -340 [-47]                                  | 290 [+36]                                                        | -49 [-7]                                                | -332 [-18]                                  | 283 [+12]                                                        |
| <b>X1</b> | 5'-GTG A <u>X</u> A TGC | -55 [-19]                                               | -385 [-107]                                 | 330 [+89]                                                        | -55 [-13]                                               | -399 [-85]                                  | 344 [+73]                                                        |
| <b>X2</b> | 3'-CAC <u>X</u> AT ACG  | -47 [-8]                                                | -386 [-93]                                  | 339 [+85]                                                        | -50 [-8]                                                | -382 [-68]                                  | 332 [+61]                                                        |
| <b>X3</b> | 3'-CAC TA <u>X</u> ACG  | -53 [-14]                                               | -409 [-116]                                 | 356 [+102]                                                       | -52 [-10]                                               | -338 [-24]                                  | 285 [+14]                                                        |
| <b>Y1</b> | 5'-GTG A <u>Y</u> A TGC | -46 [-10]                                               | -310 [-32]                                  | 264 [+23]                                                        | -47 [-5]                                                | -342 [-28]                                  | 295 [+24]                                                        |
| <b>Y2</b> | 3'-CAC <u>Y</u> AT ACG  | -54 [-15]                                               | -480 [-187]                                 | 426 [+172]                                                       | -59 [-17]                                               | -557 [-243]                                 | 499 [+228]                                                       |
| <b>Y3</b> | 3'-CAC TA <u>Y</u> ACG  | -53 [-14]                                               | -490 [-197]                                 | 436 [+182]                                                       | -51 [-9]                                                | -451 [-137]                                 | 400 [+129]                                                       |
| <b>Z1</b> | 5'-GTG A <u>Z</u> A TGC | -59 [-23]                                               | -426 [-148]                                 | 366 [+125]                                                       | -56 [-14]                                               | -395 [-81]                                  | 339 [+68]                                                        |
| <b>Z2</b> | 3'-CAC <u>Z</u> AT ACG  | -51 [-12]                                               | -427 [-134]                                 | 376 [+122]                                                       | -56 [-14]                                               | -480 [-166]                                 | 423 [+152]                                                       |
| <b>Z3</b> | 3'-CAC TA <u>Z</u> ACG  | -59 [-20]                                               | -428 [-135]                                 | 369 [+115]                                                       | -54 [-12]                                               | -369 [-55]                                  | 315 [+44]                                                        |

<sup>a</sup> Values were determined from thermal denaturation curves using the van't Hoff method and are reported as the average of two experiments.  $\Delta\Delta G^{298}$ ,  $\Delta\Delta H$  and  $\Delta(-T^{298}\Delta S)$  are calculated relative to reference duplexes **D1:D2**, **D1:R2** and **D2:R1**.

**Table S4.** Thermostability of duplexes between **B1-B4** -series and complementary RNA at various ionic strengths.<sup>a</sup>

| ON        | Sequence                       | [Na <sup>+</sup> ] = | complementary RNA                        |       |       |
|-----------|--------------------------------|----------------------|------------------------------------------|-------|-------|
|           |                                |                      | $(\Delta T_m/\text{mod})/^\circ\text{C}$ |       |       |
|           |                                |                      | 110 mM                                   | 40 mM | 10 mM |
| <b>L1</b> | 5'-GTG <u>A</u> LA TGC         |                      | 9.0                                      | 9.0   | 8.5   |
| <b>L2</b> | 3'-CAC <u>L</u> AT ACG         |                      | 7.5                                      | 7.5   | 7.5   |
| <b>L3</b> | 3'-CAC TA <u>L</u> ACG         |                      | 9.0                                      | 9.0   | 9.5   |
| <b>L4</b> | 3'-GCA <u>L</u> AL CAC         |                      | 7.5                                      | 7.8   | 7.8   |
| <b>X1</b> | 5'-GTG A <u>X</u> A TGC        |                      | 10.5                                     | 12.5  | 13.5  |
| <b>X2</b> | 3'-GCA <u>X</u> AT CAC         |                      | 10.5                                     | 13.0  | 14.0  |
| <b>X3</b> | 3'-GCA TA <u>X</u> CAC         |                      | 10.0                                     | 9.5   | 10.5  |
| <b>X4</b> | 3'-GCA <u>X</u> A <u>X</u> CAC |                      | 9.0                                      | nd    | nd    |
| <b>Y1</b> | 5'-GTG A <u>Y</u> A TGC        |                      | 9.5                                      | 12.5  | 14.5  |
| <b>Y2</b> | 3'-GCA <u>Y</u> AT CAC         |                      | 10.5                                     | 11.0  | 10.5  |
| <b>Y3</b> | 3'-GCA TA <u>Y</u> CAC         |                      | 7.0                                      | 8.0   | 9.5   |
| <b>Y4</b> | 3'-GCA <u>Y</u> A <u>Y</u> CAC |                      | 9.3                                      | 10.8  | 11.8  |
| <b>Z1</b> | 5'-GTG A <u>Z</u> A TGC        |                      | 12.5                                     | 16.5  | 18.0  |
| <b>Z2</b> | 3'-GCA <u>Z</u> AT CAC         |                      | 11.0                                     | 12.5  | 14.5  |
| <b>Z3</b> | 3'-GCA TA <u>Z</u> CAC         |                      | 14.0                                     | 17.5  | 19.5  |
| <b>Z4</b> | 3'-GCA <u>Z</u> A <u>Z</u> CAC |                      | 13.0                                     | 14.8  | 17.0  |

<sup>a</sup> Graphical representation shown in Figure 1 of main text.  $\Delta T_m$  = change in  $T_m$  relative to matched duplex (**D1:R2** or **R1:D2**) in the corresponding buffer: **D1:R2** ( $T_{m,110\text{ mM}} = 28.0\text{ }^\circ\text{C}$ ,  $T_{m,40\text{ mM}} = 21.0\text{ }^\circ\text{C}$ ,  $T_{m,10\text{ mM}} = 11.5\text{ }^\circ\text{C}$ ); **R1:D2** ( $T_{m,110\text{ mM}} = 28.0\text{ }^\circ\text{C}$ ,  $T_{m,40\text{ mM}} = 22.0\text{ }^\circ\text{C}$ ,  $T_{m,10\text{ mM}} = 12.0\text{ }^\circ\text{C}$ ). Buffer conditions: ( $[\text{Na}^+] = 110\text{ mM}$ ,  $[\text{Cl}^-] = 100\text{ mM}$ , pH 7.0 (NaH<sub>2</sub>PO<sub>4</sub>/Na<sub>2</sub>HPO<sub>4</sub>)), ( $[\text{Na}^+] = 40\text{ mM}$ ,  $[\text{Cl}^-] = 30\text{ mM}$ , pH 7.0 (NaH<sub>2</sub>PO<sub>4</sub>/Na<sub>2</sub>HPO<sub>4</sub>)) or ( $[\text{Na}^+] = 10\text{ mM}$ , pH 7.0 (NaH<sub>2</sub>PO<sub>4</sub>/Na<sub>2</sub>HPO<sub>4</sub>)) for 110 mM Na<sup>+</sup>, 40 mM Na<sup>+</sup>, and 10 mM Na<sup>+</sup>, respectively. nd = not determined.

**Table S5.** Thermostability of duplexes between **B1-B4** -series and complementary DNA at various ionic strengths.<sup>a</sup>

| ON | Sequence                       | [Na <sup>+</sup> ] = | complementary DNA             |       |       |
|----|--------------------------------|----------------------|-------------------------------|-------|-------|
|    |                                |                      | $\Delta T_m / ^\circ\text{C}$ |       |       |
|    |                                |                      | 110 mM                        | 40 mM | 10 mM |
| L1 | 5'-GTG <u>A</u> LA TGC         |                      | 6.5                           | 7.0   | 6.0   |
| L2 | 3'-CAC <u>L</u> AT ACG         |                      | 4.5                           | 4.0   | 4.5   |
| L3 | 3'-CAC TA <u>L</u> ACG         |                      | 7.0                           | 6.5   | 6.5   |
| L4 | 3'-GCA <u>L</u> AL CAC         |                      | 5.0                           | 5.5   | 5.0   |
| X1 | 5'-GTG A <u>X</u> A TGC        |                      | 10.5                          | nd    | nd    |
| X2 | 3'-GCA <u>X</u> AT CAC         |                      | 6.5                           | 6.5   | 7.0   |
| X3 | 3'-GCA TA <u>X</u> CAC         |                      | 8.5                           | 9.5   | 10.0  |
| X4 | 3'-GCA <u>X</u> A <u>X</u> CAC |                      | 8.0                           | nd    | nd    |
| Y1 | 5'-GTG A <u>Y</u> A TGC        |                      | 7.0                           | 9.0   | 9.5   |
| Y2 | 3'-GCA <u>Y</u> AT CAC         |                      | 7.0                           | 5.5   | 6.5   |
| Y3 | 3'-GCA TA <u>Y</u> CAC         |                      | 7.5                           | 9.5   | 8.5   |
| Y4 | 3'-GCA <u>Y</u> A <u>Y</u> CAC |                      | 7.5                           | 9.0   | 10.0  |
| Z1 | 5'-GTG A <u>Z</u> A TGC        |                      | 9.0                           | 11.0  | 12.5  |
| Z2 | 3'-GCA <u>Z</u> AT CAC         |                      | 7.5                           | 9.0   | 8.5   |
| Z3 | 3'-GCA TA <u>Z</u> CAC         |                      | 9.5                           | 12.5  | 14.5  |
| Z4 | 3'-GCA <u>Z</u> A <u>Z</u> CAC |                      | 10.0                          | 11.0  | 14.0  |

<sup>a</sup>  $\Delta T_m$  = change in  $T_m$  relative to matched duplex (**D1:D2**) in the corresponding buffer:  $T_{m,110\text{ mM}} = 29.5\text{ }^\circ\text{C}$ ,  $T_{m,40\text{ mM}} = 23.5\text{ }^\circ\text{C}$ ,  $T_{m,10\text{ mM}} = 14.0\text{ }^\circ\text{C}$ . For buffers, see Table S4. nd = not determined.

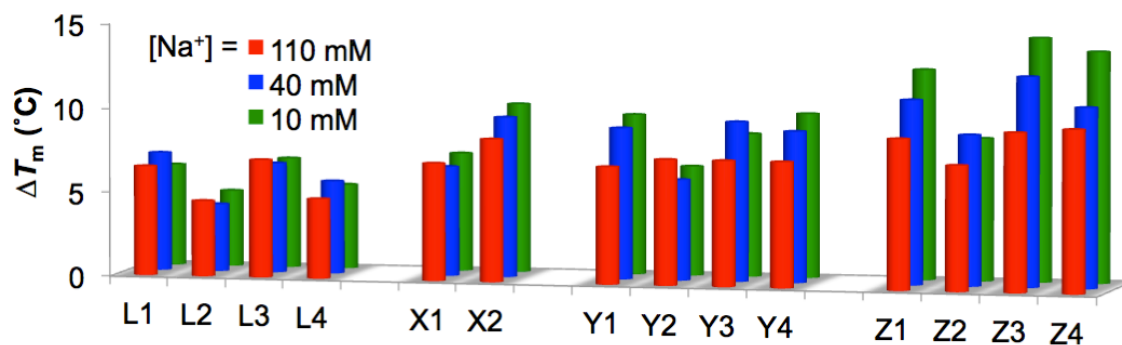

**Figure S2.** Thermostability of duplexes between **B1-B4** -series and complementary DNA at different ionic strengths. See Table S5 for conditions and raw data.

**Table S6.** Discrimination of mismatched DNA targets by **B1**-series and reference strands.<sup>a</sup>

| ON        | Sequence                | <u>M</u> = | DNA: 3'-CAC <u>TMT</u> ACG |                             |       |       |
|-----------|-------------------------|------------|----------------------------|-----------------------------|-------|-------|
|           |                         |            | $T_m/^\circ\text{C}$       | $\Delta T_m/^\circ\text{C}$ |       |       |
|           |                         |            | A                          | C                           | G     | T     |
| <b>D1</b> | 5'-GTG ATA TGC          |            | <b>29.5</b>                | -16.5                       | -8.0  | -15.5 |
| <b>L1</b> | 5'-GTG A <u>L</u> A TGC |            | <b>34.5</b>                | -18.0                       | -11.0 | -16.0 |
| <b>X1</b> | 5'-GTG A <u>X</u> A TGC |            | <b>37.5</b>                | -23.5                       | -14.5 | -19.5 |
| <b>Y1</b> | 5'-GTG A <u>Y</u> A TGC |            | <b>36.5</b>                | -18.0                       | -15.0 | -17.5 |
| <b>Z1</b> | 5'-GTG A <u>Z</u> A TGC |            | <b>38.5</b>                | -16.5                       | -12.5 | -16.0 |

<sup>a</sup> For conditions of thermal denaturation experiments, see Table 1.  $T_m$ 's of fully matched duplexes are shown in bold.  $\Delta T_m$  = change in  $T_m$  relative to fully matched **D1:D2** duplex.

**Table S7.** Discrimination of mismatched RNA/DNA targets by **B4**-series and reference strands.<sup>a</sup>

| ON        | Sequence               | <u>M</u> = | RNA: 5'-GUG A <u>MA</u> UGC               |       |                             |       | DNA: 5'-GTG A <u>MA</u> TGC               |        |                             |       |
|-----------|------------------------|------------|-------------------------------------------|-------|-----------------------------|-------|-------------------------------------------|--------|-----------------------------|-------|
|           |                        |            | $T_m/^\circ\text{C}$ [ $^\circ\text{C}$ ] |       | $\Delta T_m/^\circ\text{C}$ |       | $T_m/^\circ\text{C}$ [ $^\circ\text{C}$ ] |        | $\Delta T_m/^\circ\text{C}$ |       |
|           |                        |            | T                                         | A     | C                           | G     | T                                         | A      | C                           | G     |
| <b>D2</b> | 3'-CAC TAT ACG         |            | <b>28.0</b>                               | -17.0 | -17.0                       | -12.0 | <b>29.5</b>                               | <-19.5 | -16.5                       | -7.5  |
| <b>L4</b> | 3'-CAC <u>L</u> AL ACG |            | <b>43.0</b>                               | -21.0 | -16.5                       | -17.0 | <b>40.0</b>                               | -17.0  | -15.5                       | -19.5 |
| <b>X4</b> | 3'-CAC <u>X</u> AX ACG |            | <b>49.5</b>                               | -13.0 | -15.5                       | -16.0 | <b>46.0</b>                               | nd     | nd                          | nd    |
| <b>Y4</b> | 3'-CAC <u>Y</u> AY ACG |            | <b>46.5</b>                               | -17.0 | -15.5                       | -16.0 | <b>44.5</b>                               | -10.0  | -13.0                       | -10.5 |
| <b>Z4</b> | 3'-CAC <u>Z</u> AZ ACG |            | <b>54.0</b>                               | -29.0 | -20.0                       | -25.0 | <b>49.0</b>                               | -4.0   | -6.0                        | -6.0  |

<sup>a</sup>  $\Delta T_m$  = change in  $T_m$  relative to fully matched duplex shown in bold (**R1:B4** or **D1:B4**). nd = not determined.

**Table S8.** Thermostability of duplexes between antisense ONs (ASO) and complementary targets.<sup>a</sup>

| ON           | Duplex                                                                             | $\underline{b} =$ | $T_m [\Delta T_m / \text{mod}] / ^\circ\text{C}$ |      |
|--------------|------------------------------------------------------------------------------------|-------------------|--------------------------------------------------|------|
|              |                                                                                    |                   | L                                                | Z    |
| ASO B1<br>R3 | 5'- <u>bcg</u> AAG TAC TCG GCG TAg <u>gbT</u><br>3'- r(AGC UUC AUG UGC CGC AUC CA) |                   | 60.0                                             | 59.5 |
| ASO B1<br>D3 | 5'- <u>bcg</u> AAG TAC TCG GCG TAg <u>gbT</u><br>3'- d(AGC TTC ATG TGC CGC ATC CA) |                   | 61.0                                             | 57.5 |

<sup>a</sup> For monomer structures, see Scheme 1. Lower case letters denote canonical LNA; underlined denotes phosphorothioate backbone.

## References

- S1. P. Kumar, M. Østergaard, B. Bharal, B. A. Anderson, D. C. Guenther, M. Kaura, D. J. Raible, P. K. Sharma and P. J. Hrdlicka, *J. Org. Chem.*, DOI:10.1021/jo500614a.
- S2. Couplings between 5-iodo-5'-O-(4,4'-dimethoxytrityl)-LNA uridine and Fmoc-protected amino acids were unsuccessful in our hands.
- S3. R. B. C. Jagt, R. F. Gómez-Biagi, and M. Nitz, *Angew. Chem. Int. Ed.*, 2009, **48**, 1995.
- S4. P. A. Jass, V. W. Rosso, S. Racha, N. Soundararajan, J. J. Venit, A. Rusowicz, S. Swaminathan, J. Livshitz, and E. J. Delaney, *Tetrahedron*, 2003, **59**, 9019.



<sup>1</sup>H

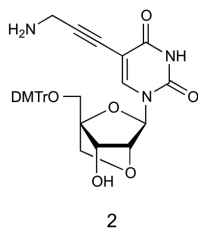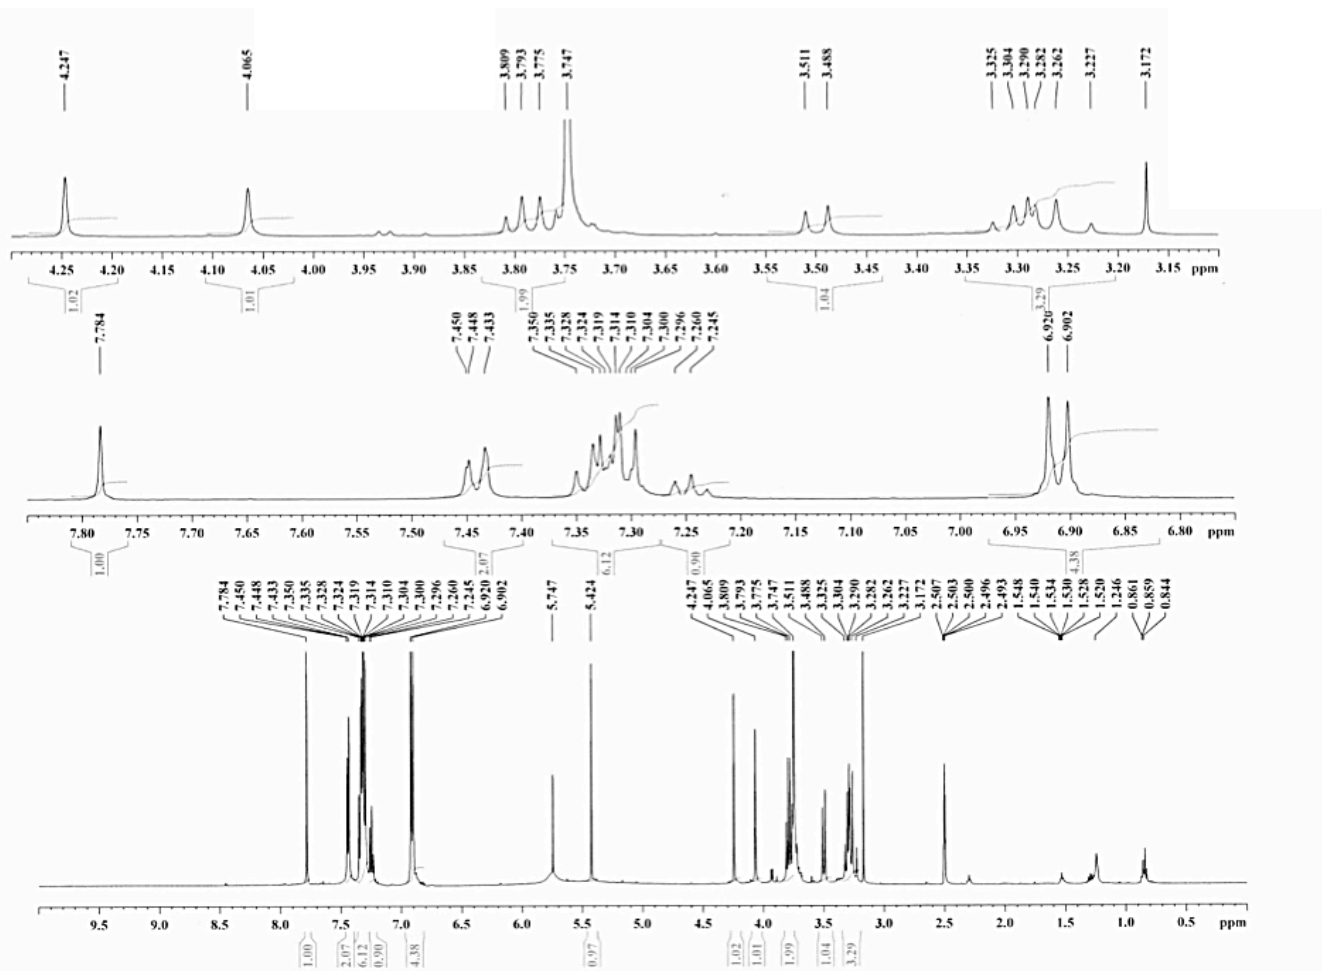

<sup>13</sup>C

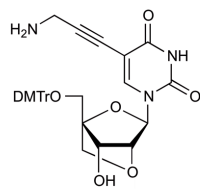

2

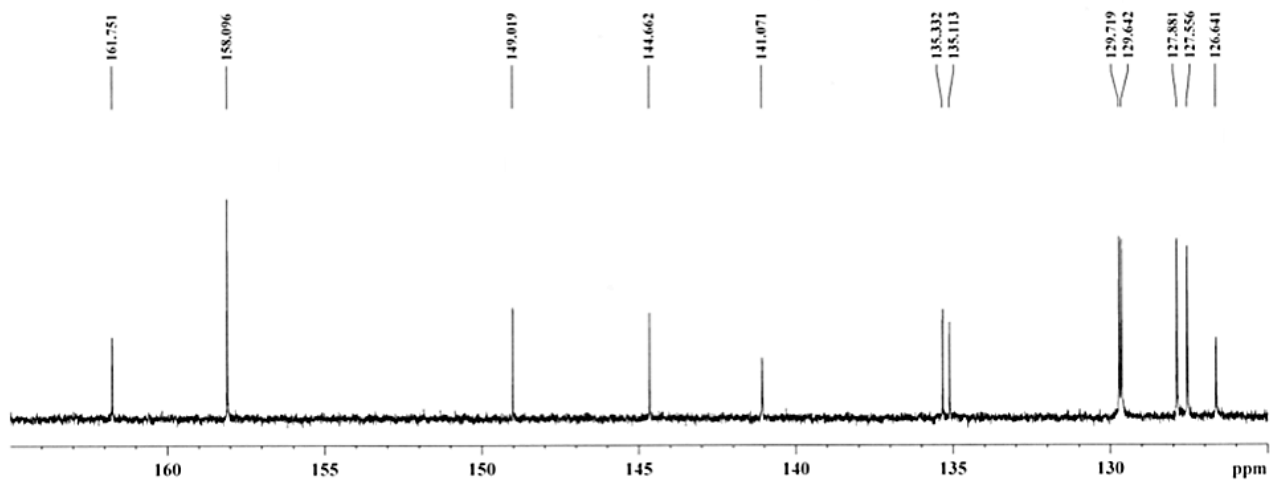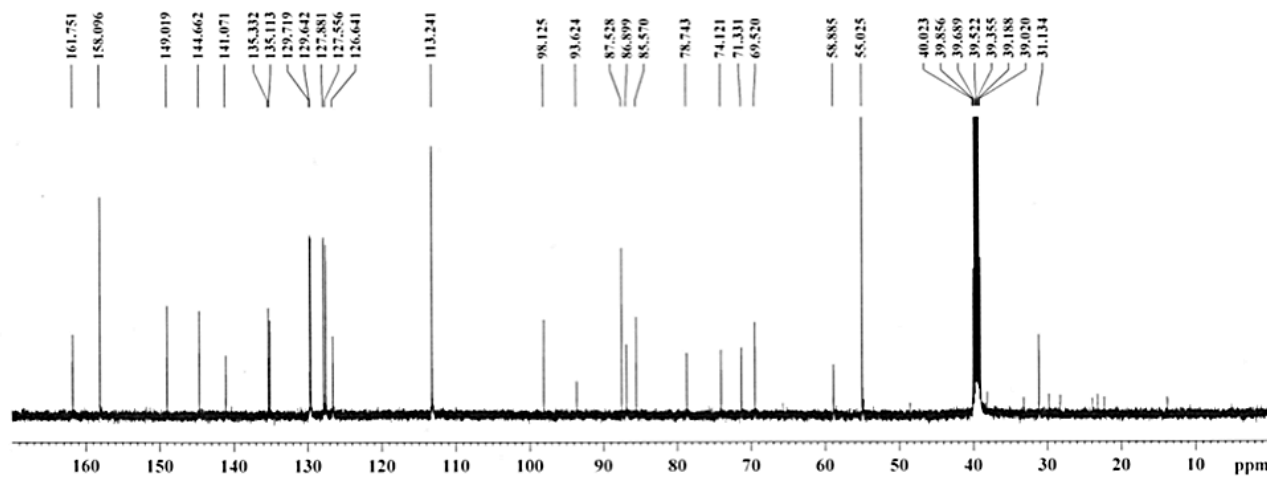

COSY

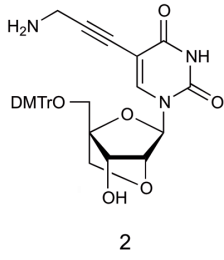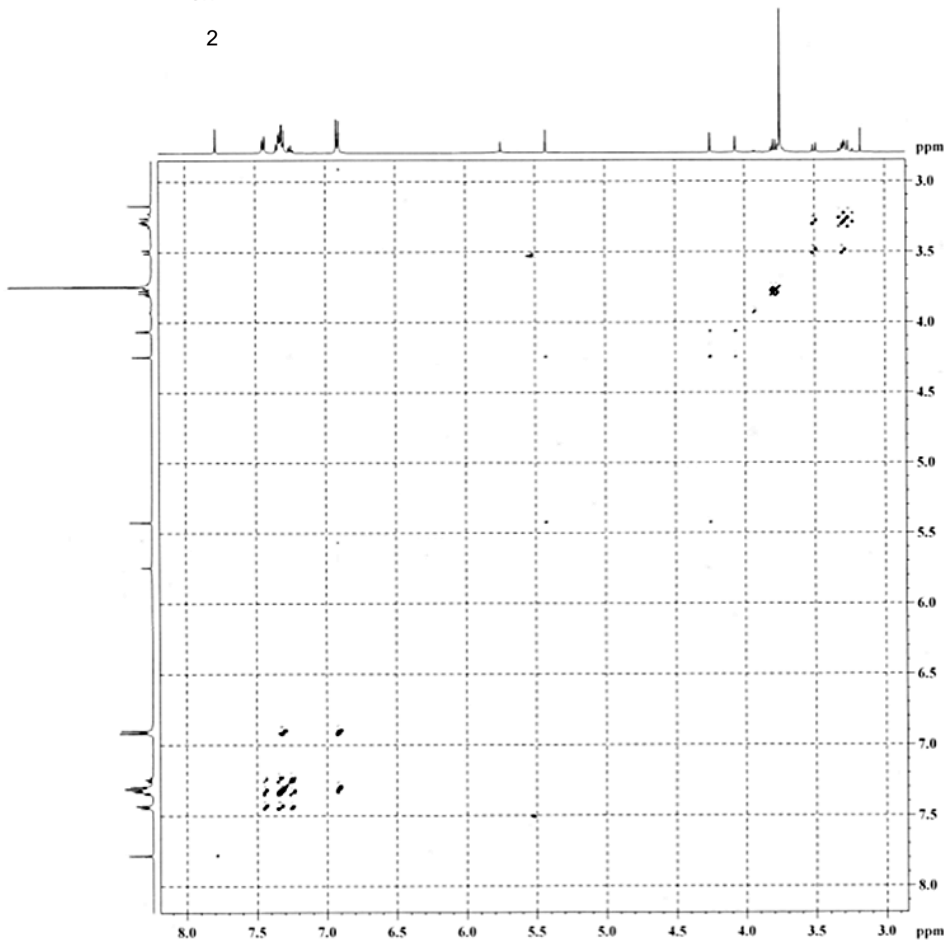

DEPT

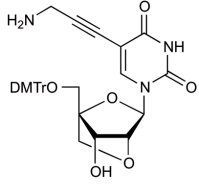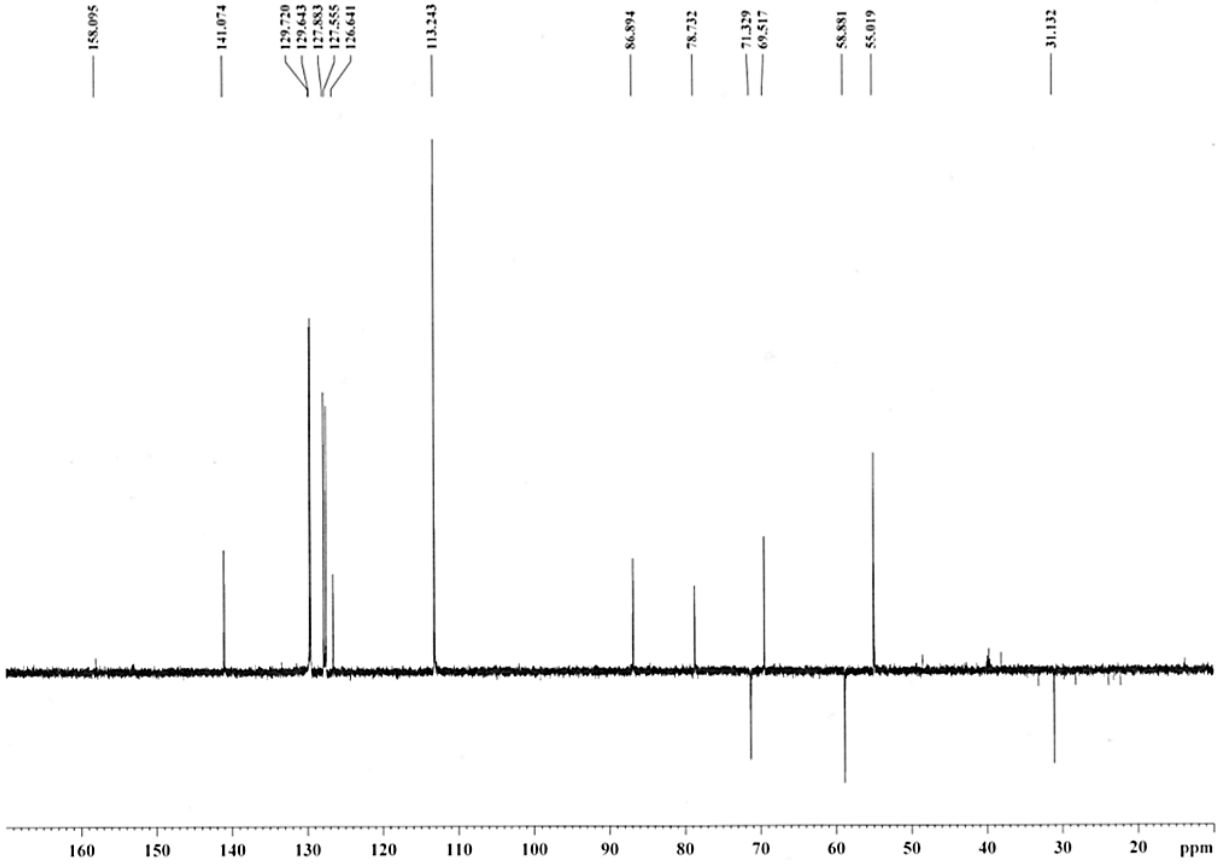

HSQC

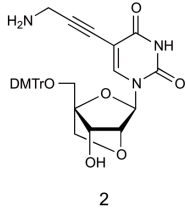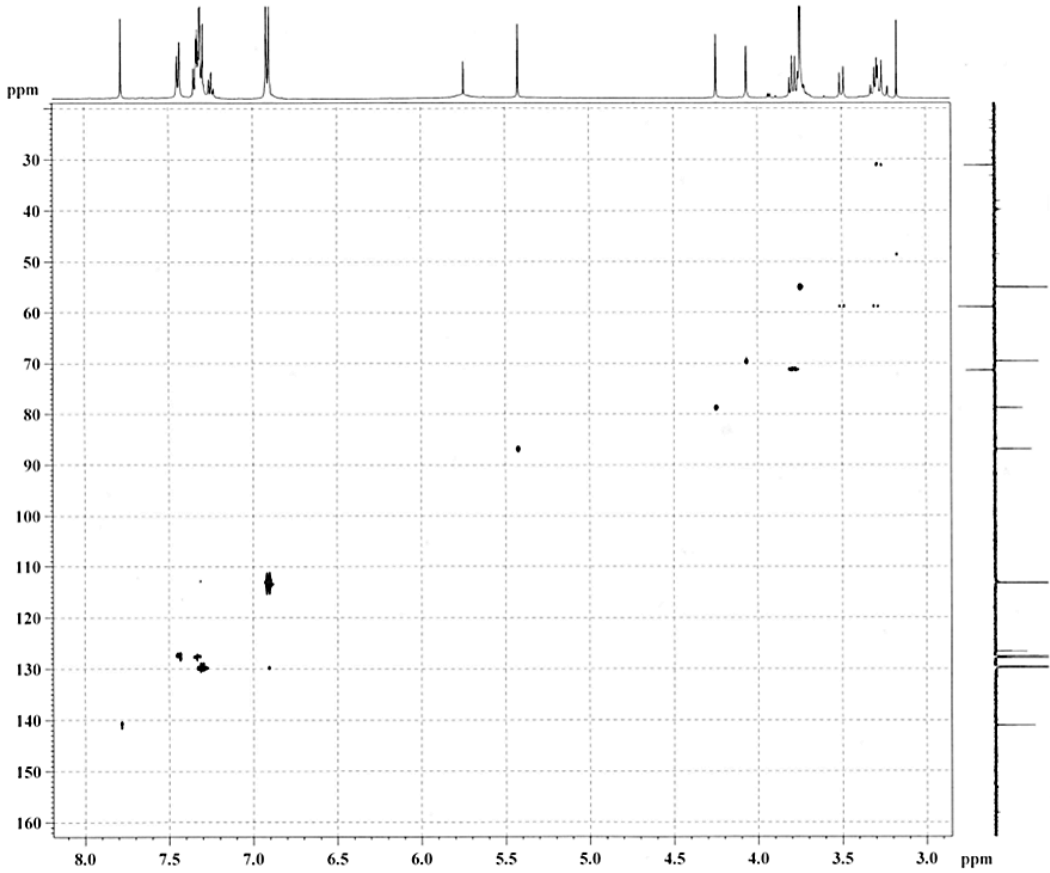

<sup>1</sup>H

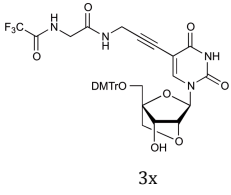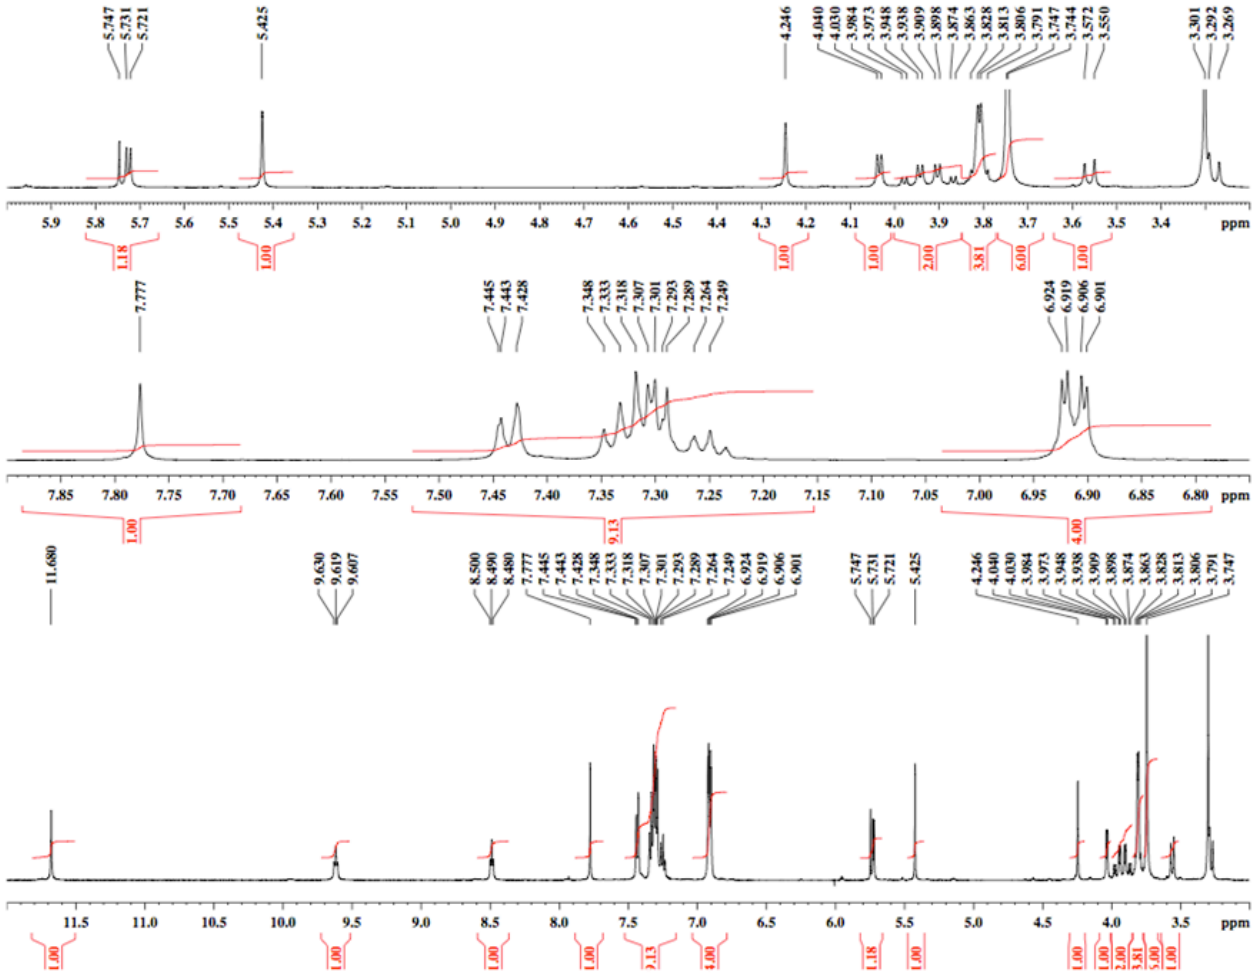

<sup>13</sup>C

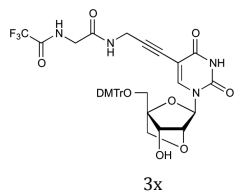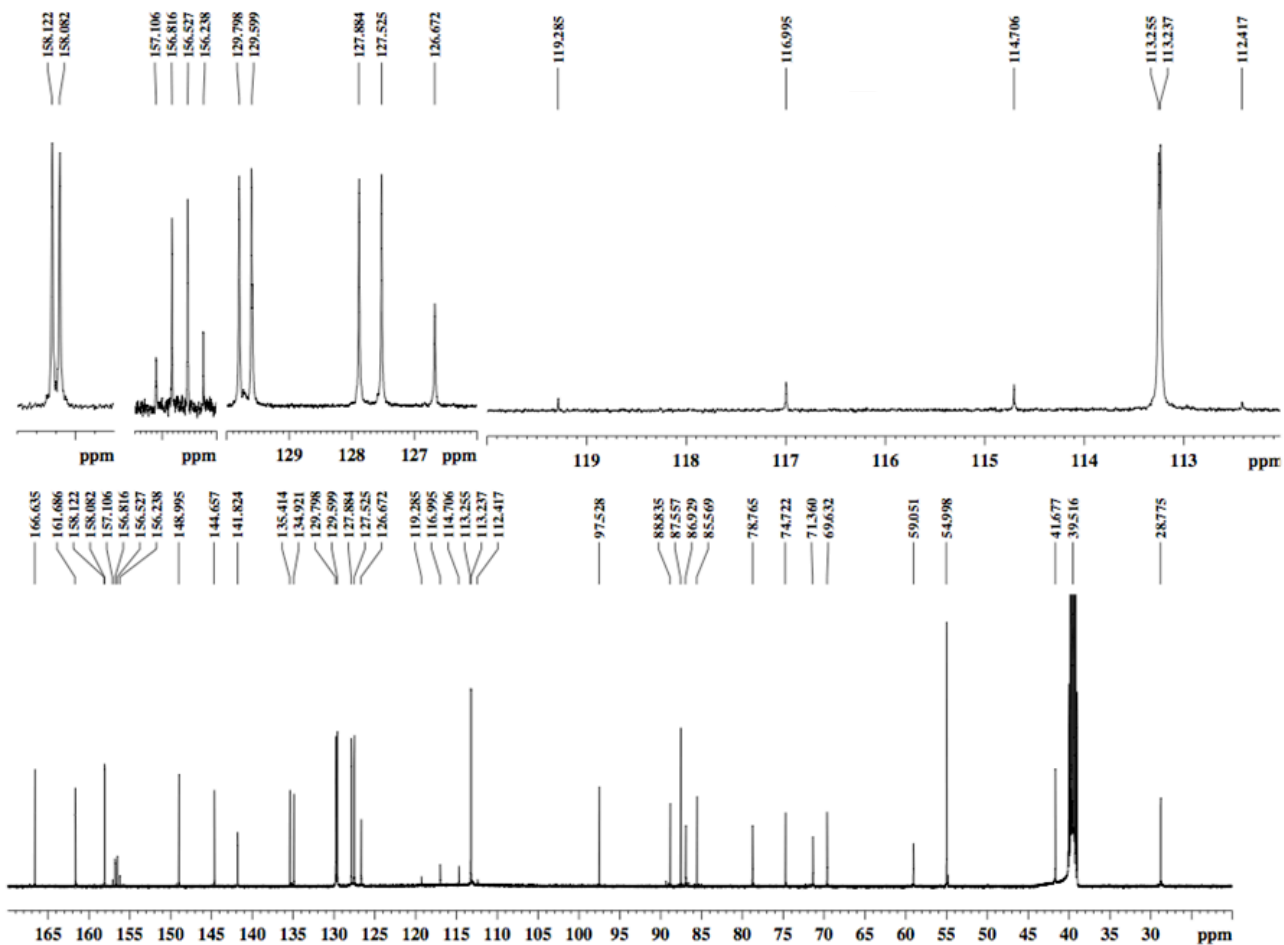

COSY

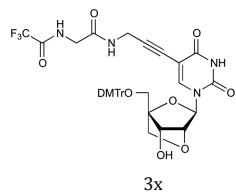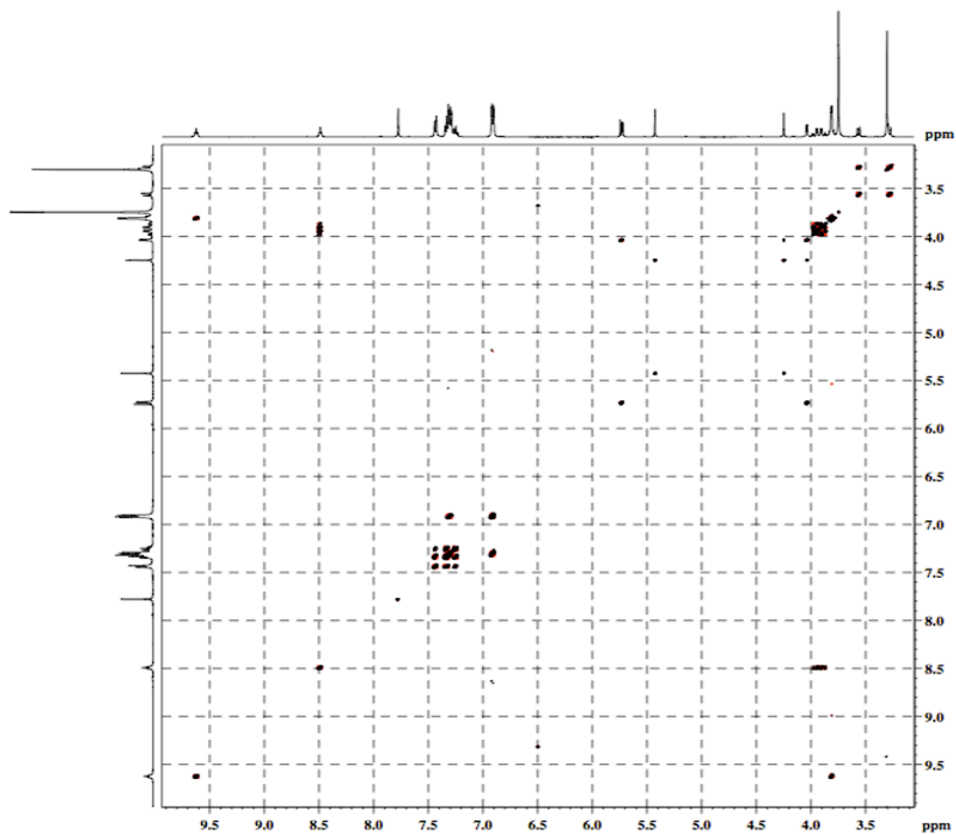



DEPT

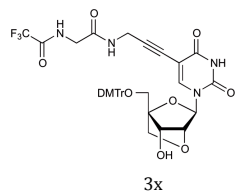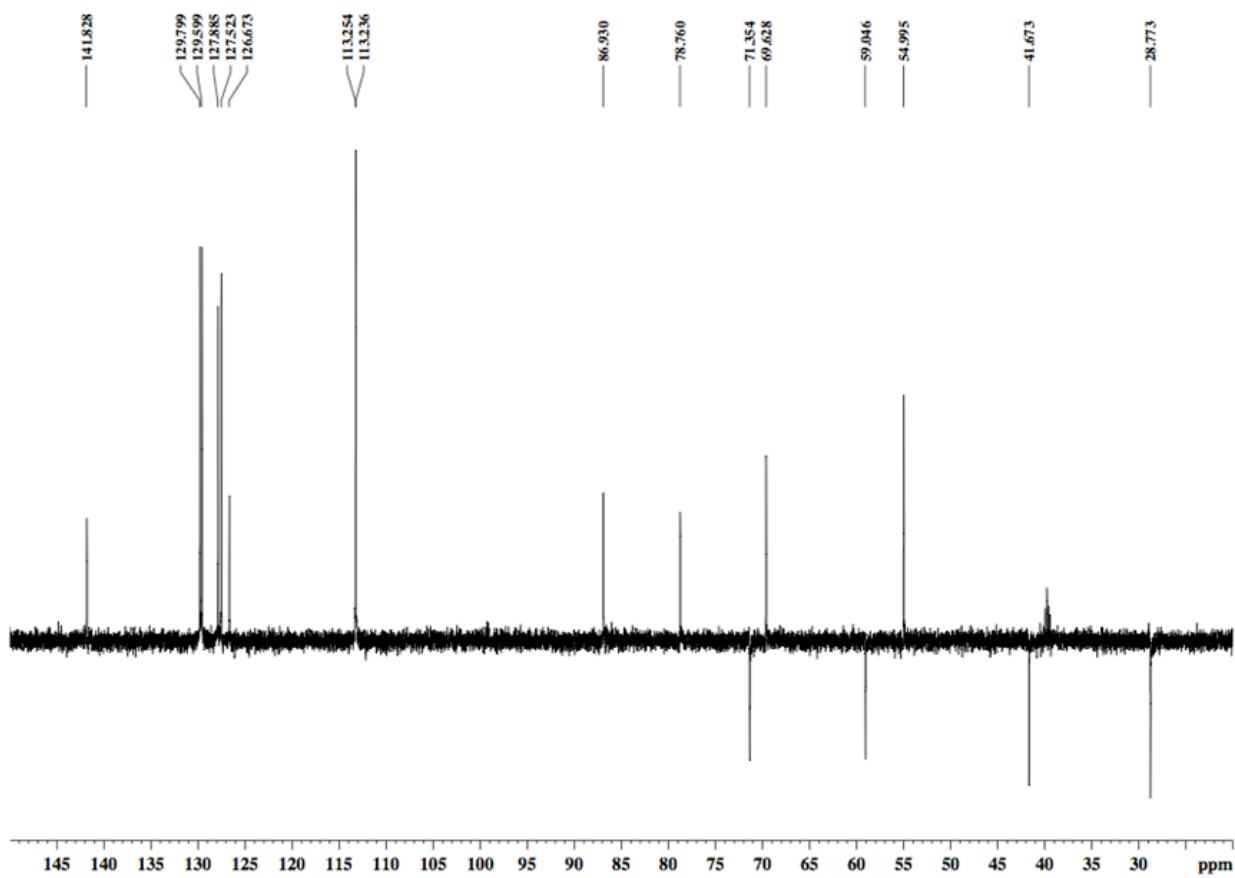

HSQC

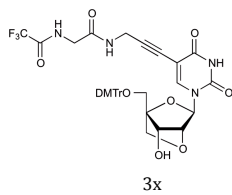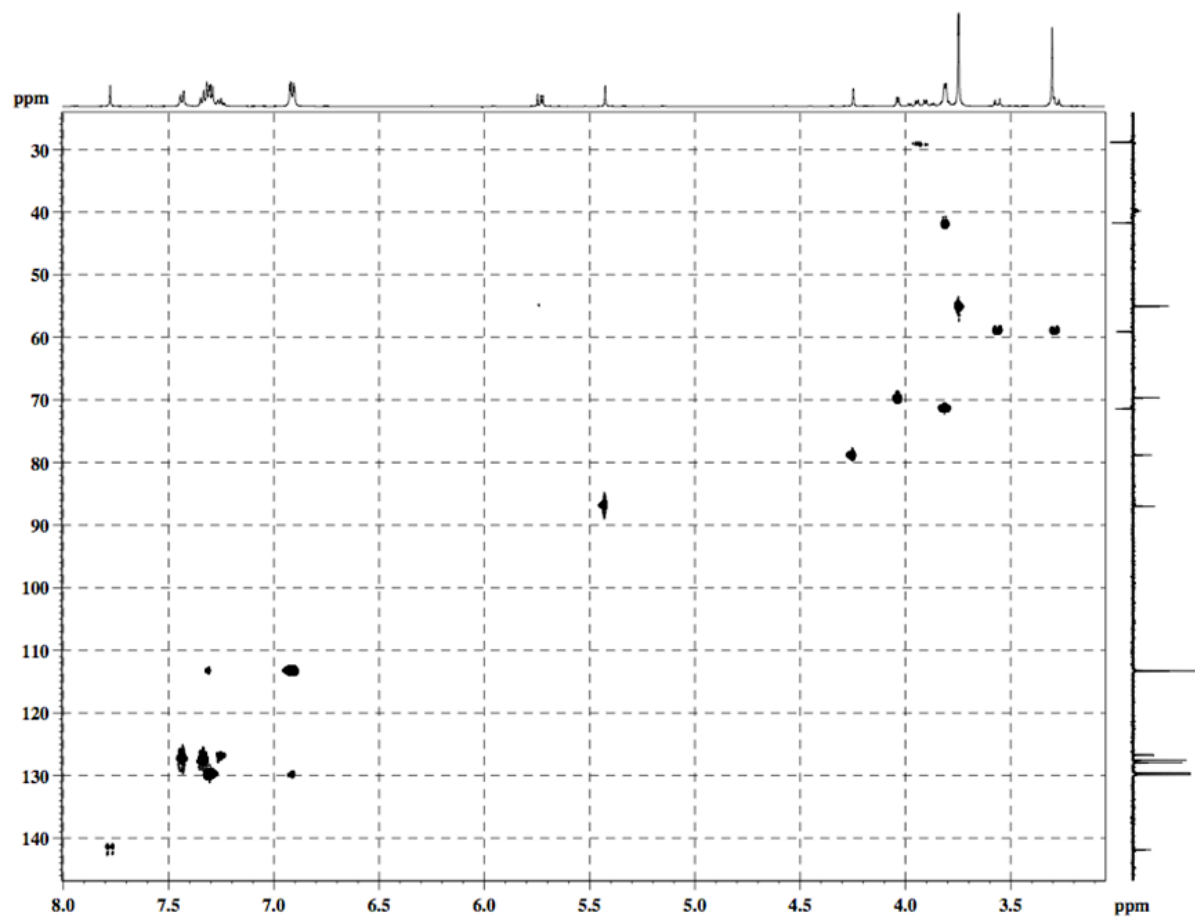

19F

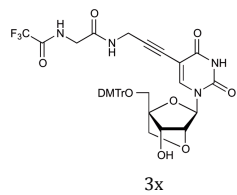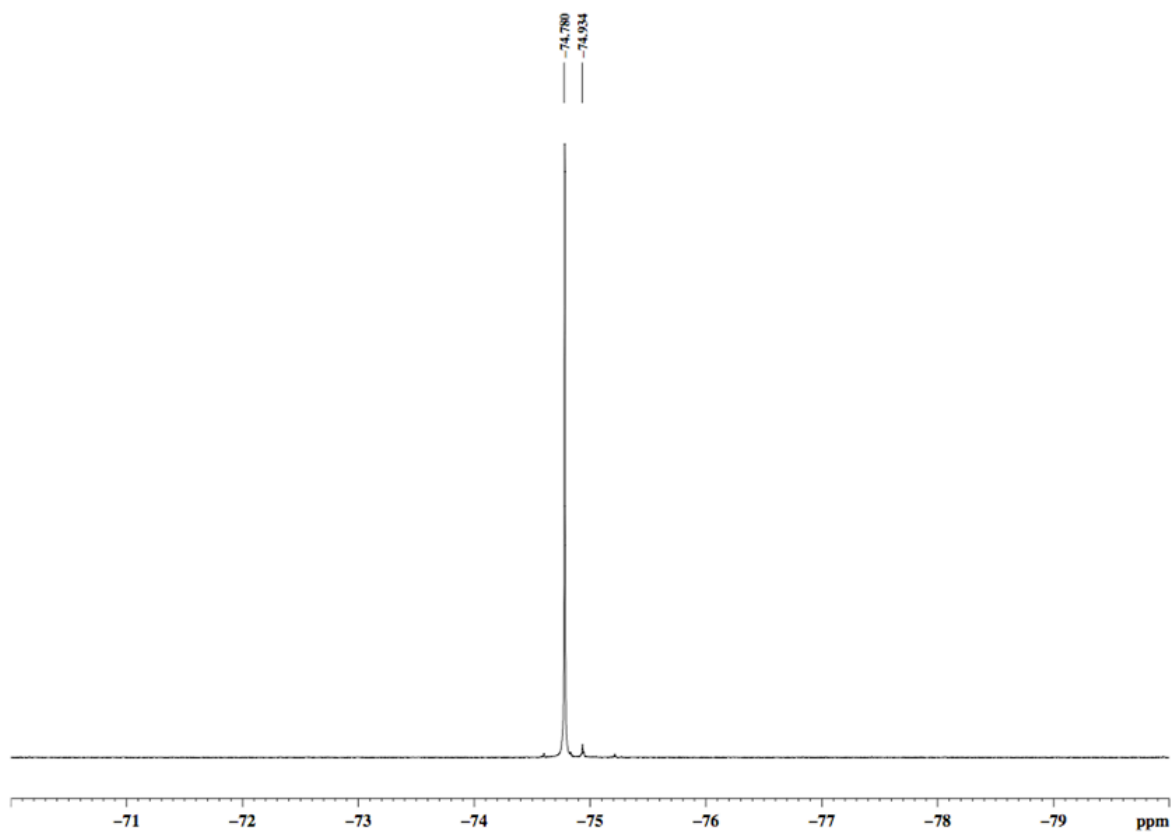

<sup>1</sup>H

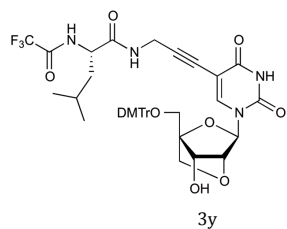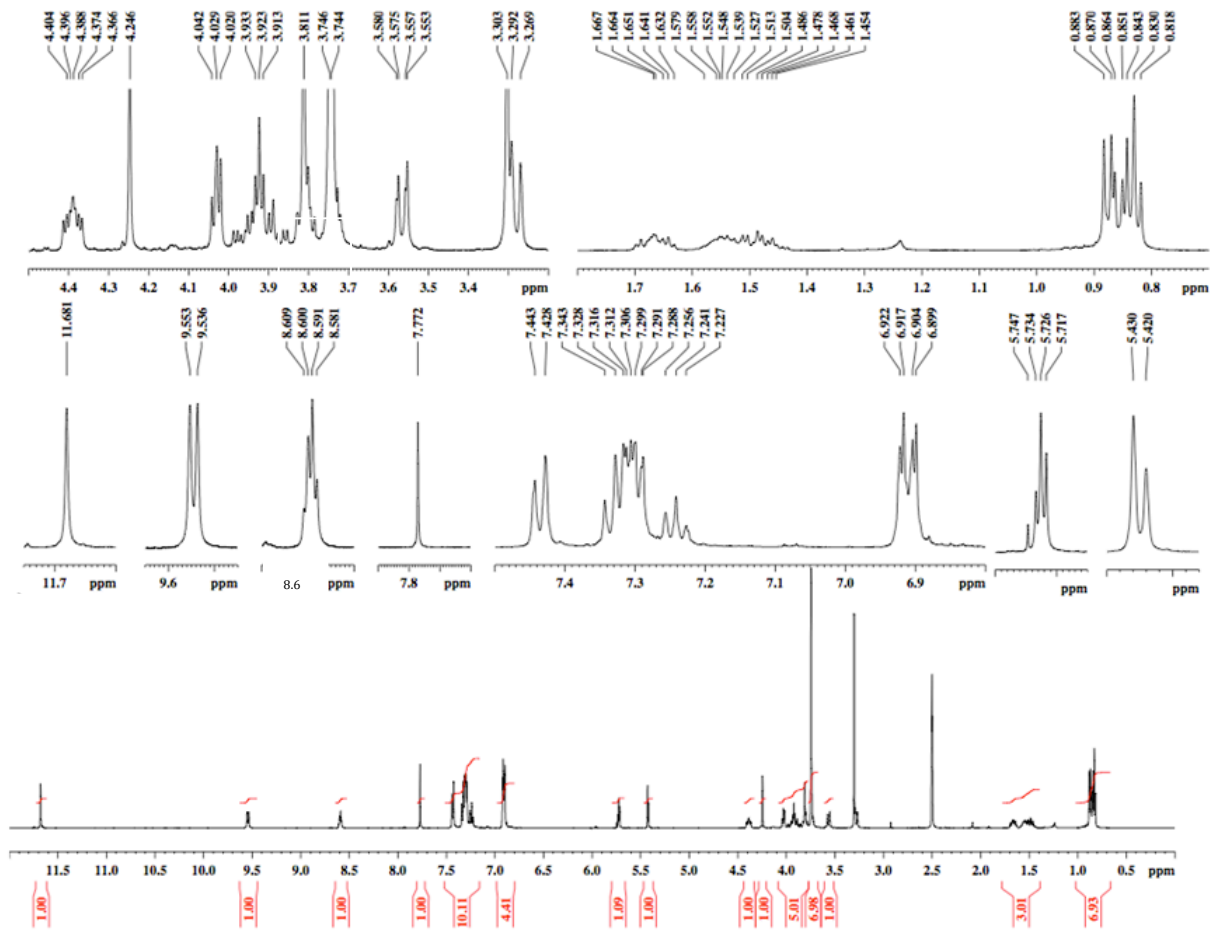

<sup>13</sup>C

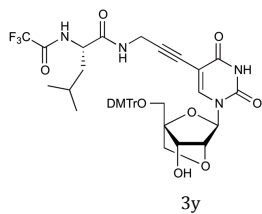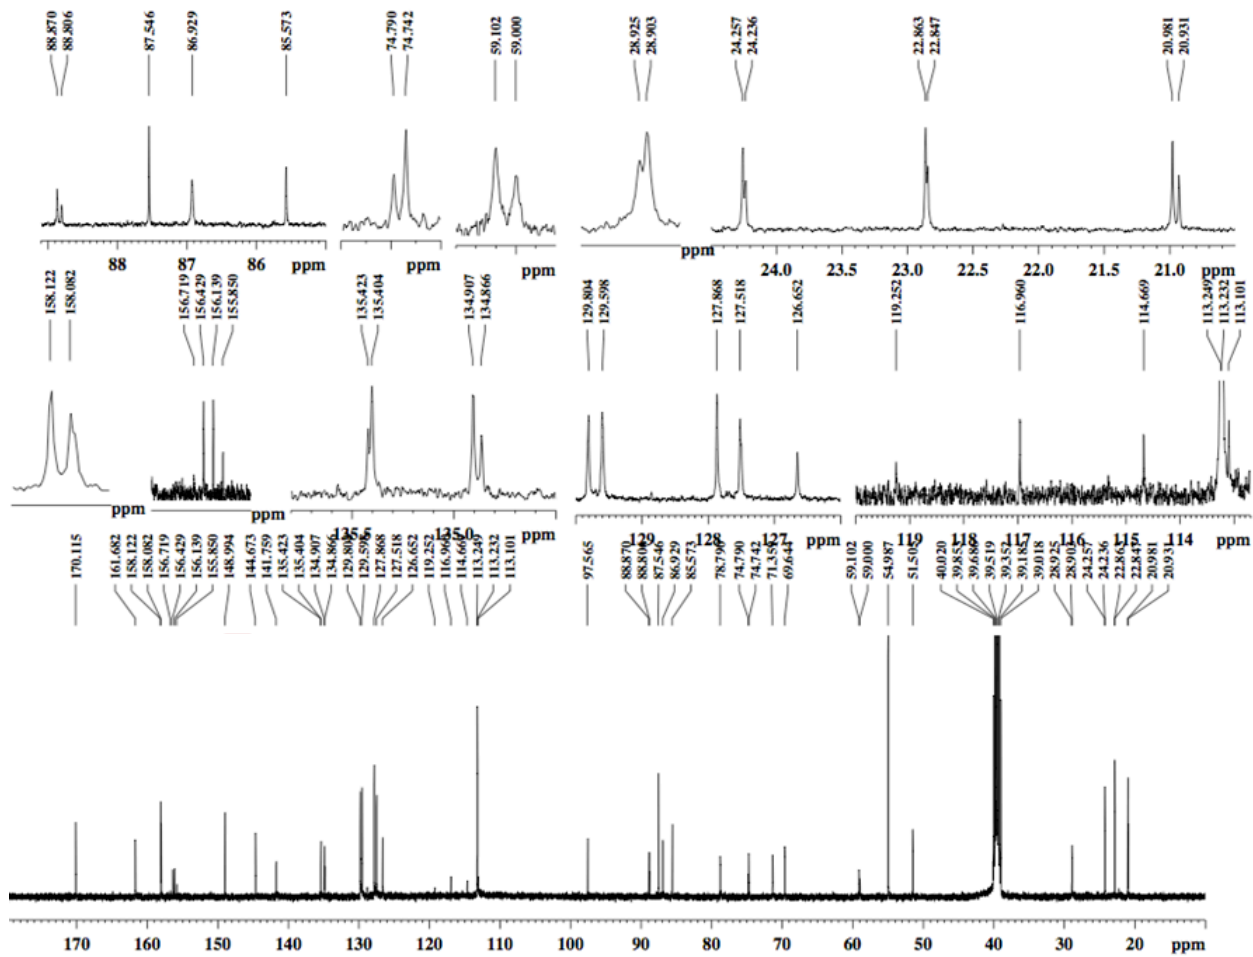

COSY

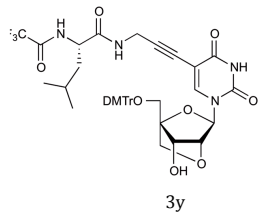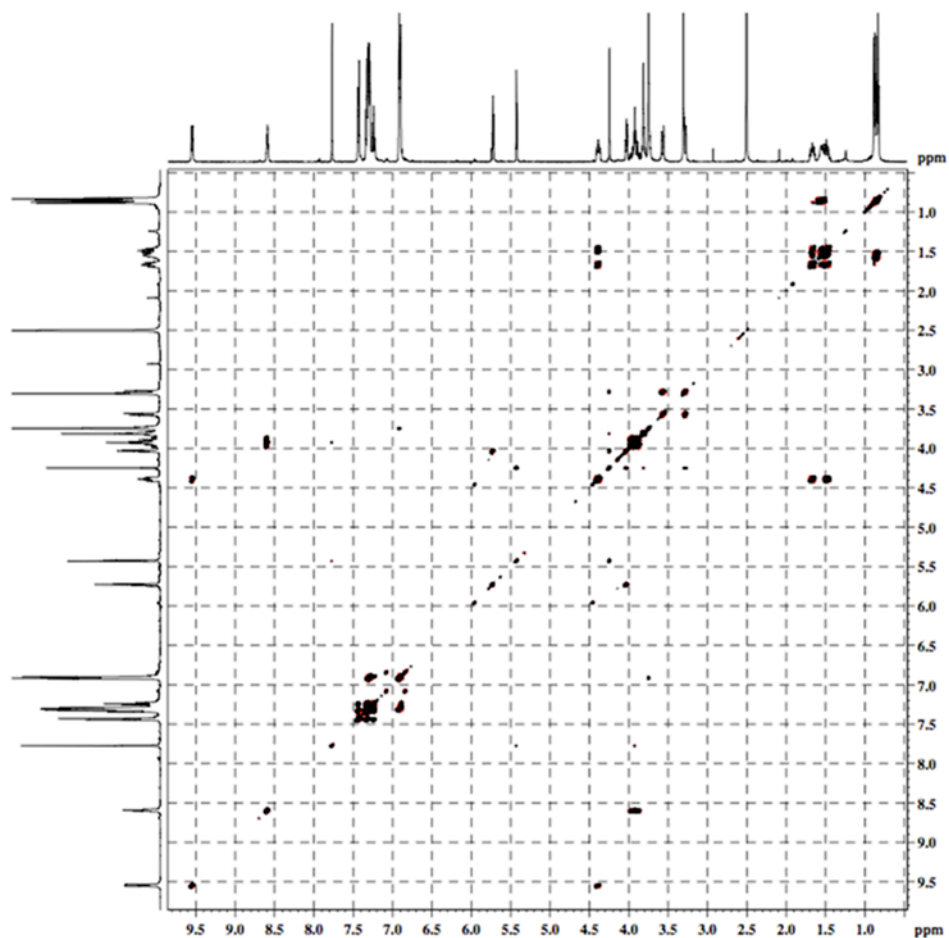

DEPT

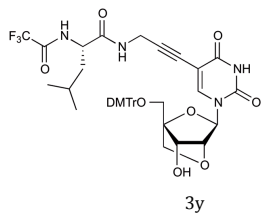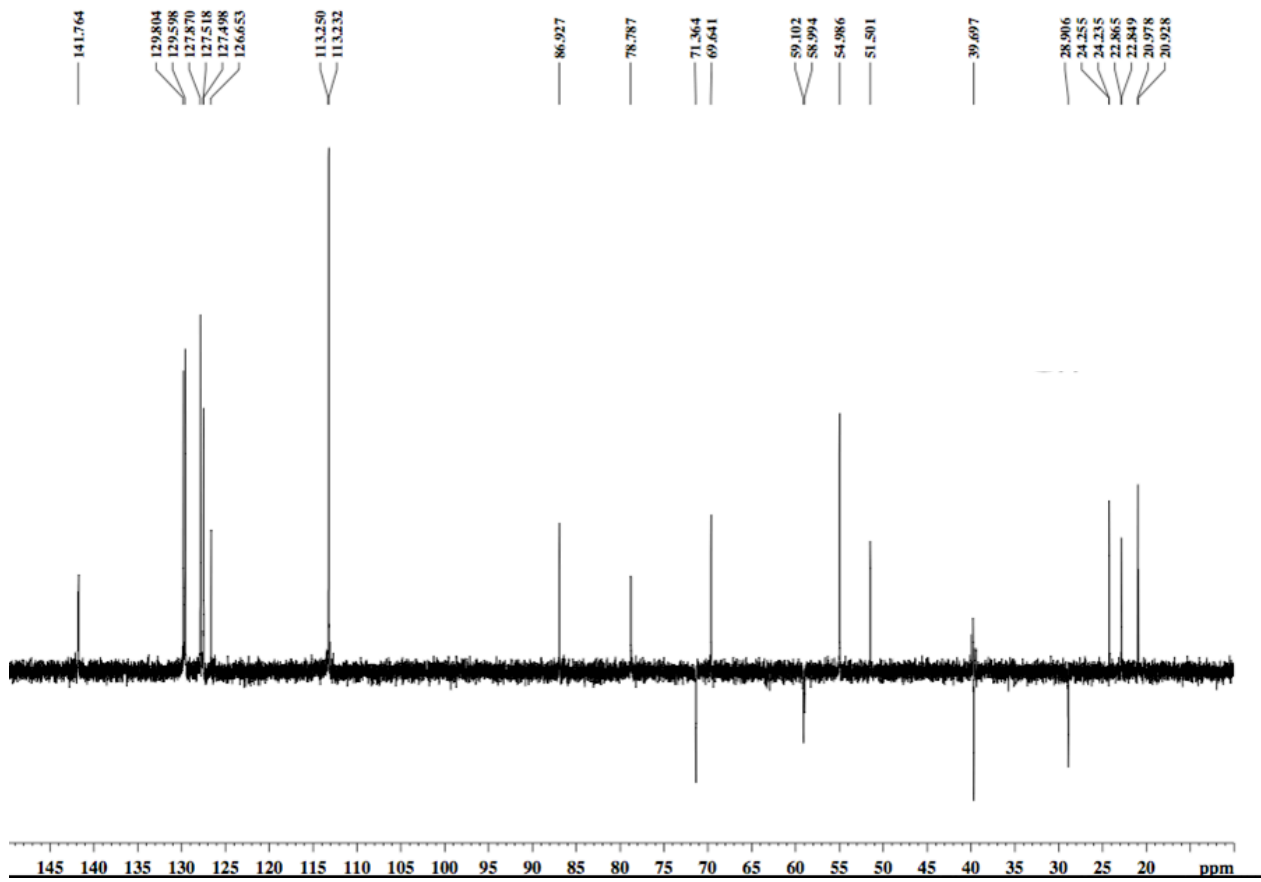

HSQC

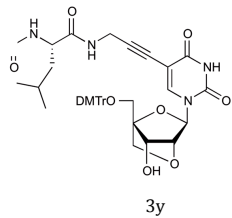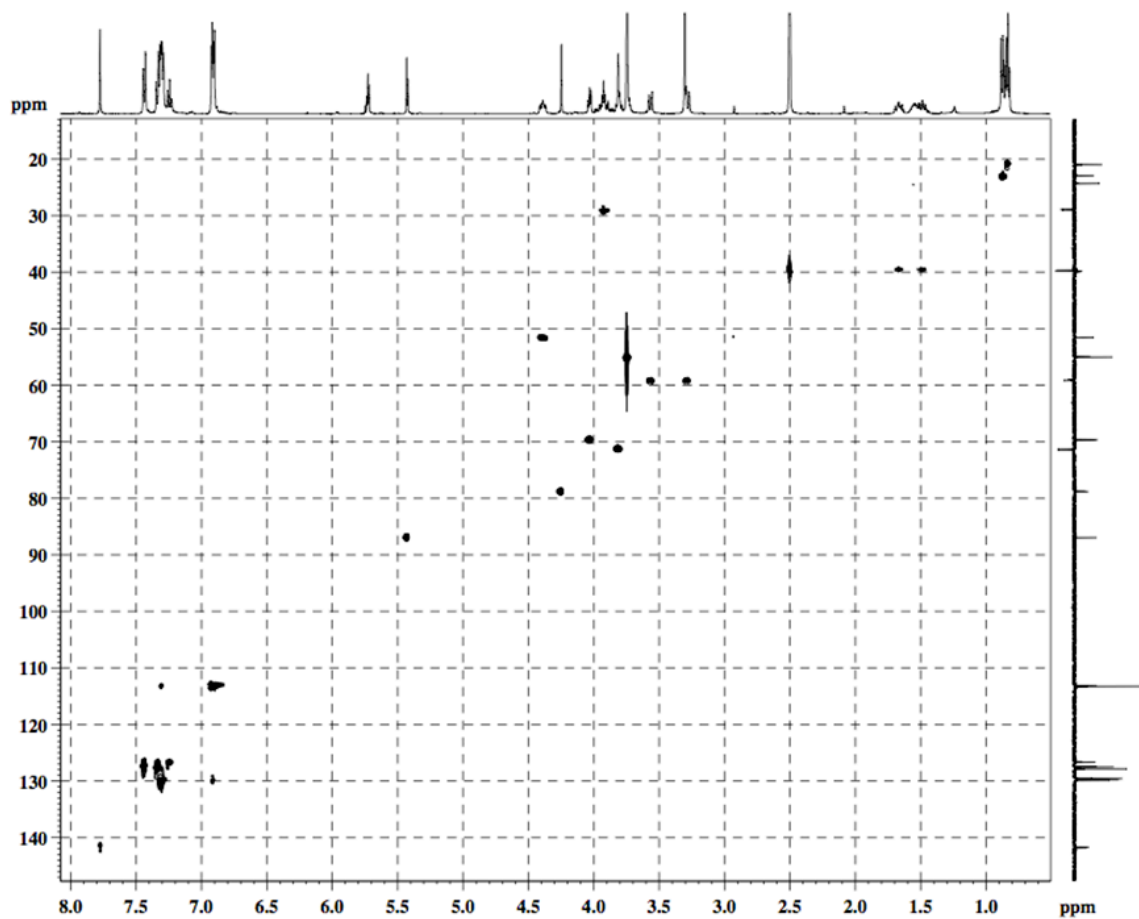



<sup>19</sup>F

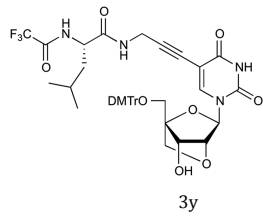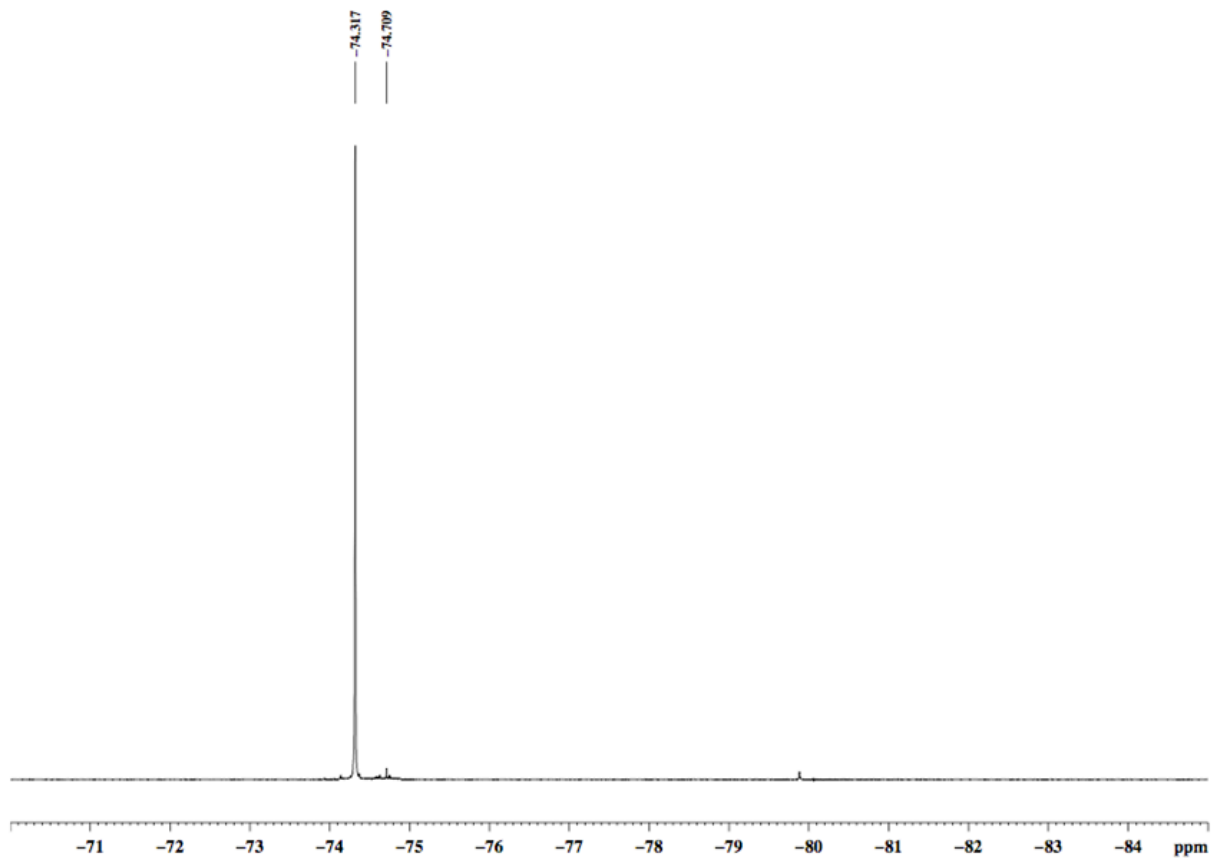

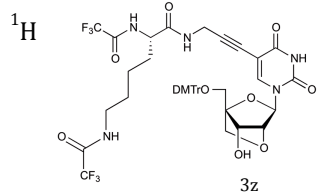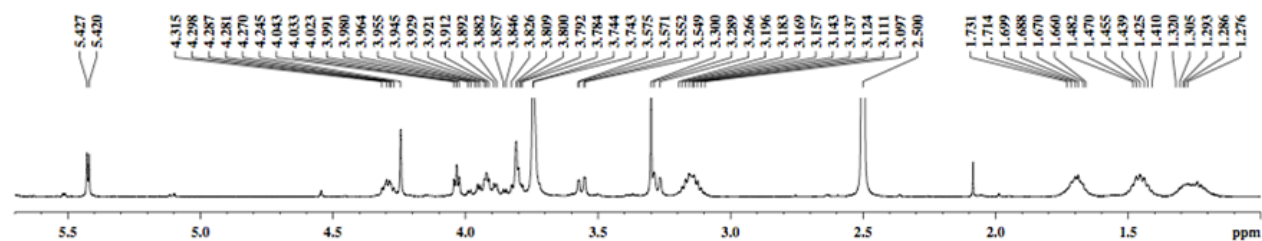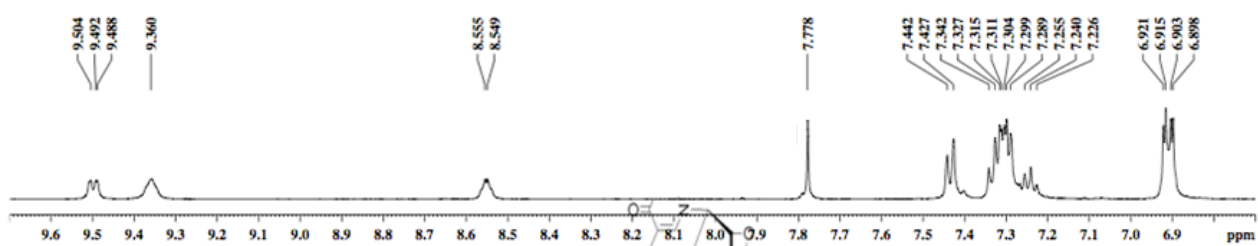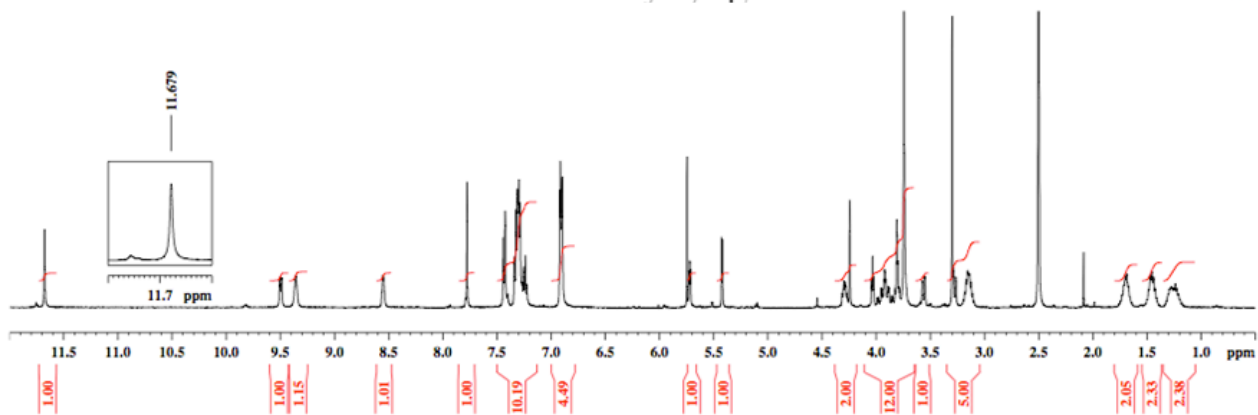

<sup>13</sup>C

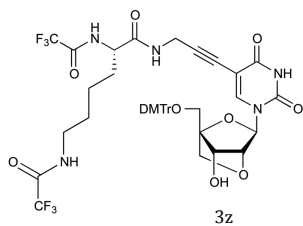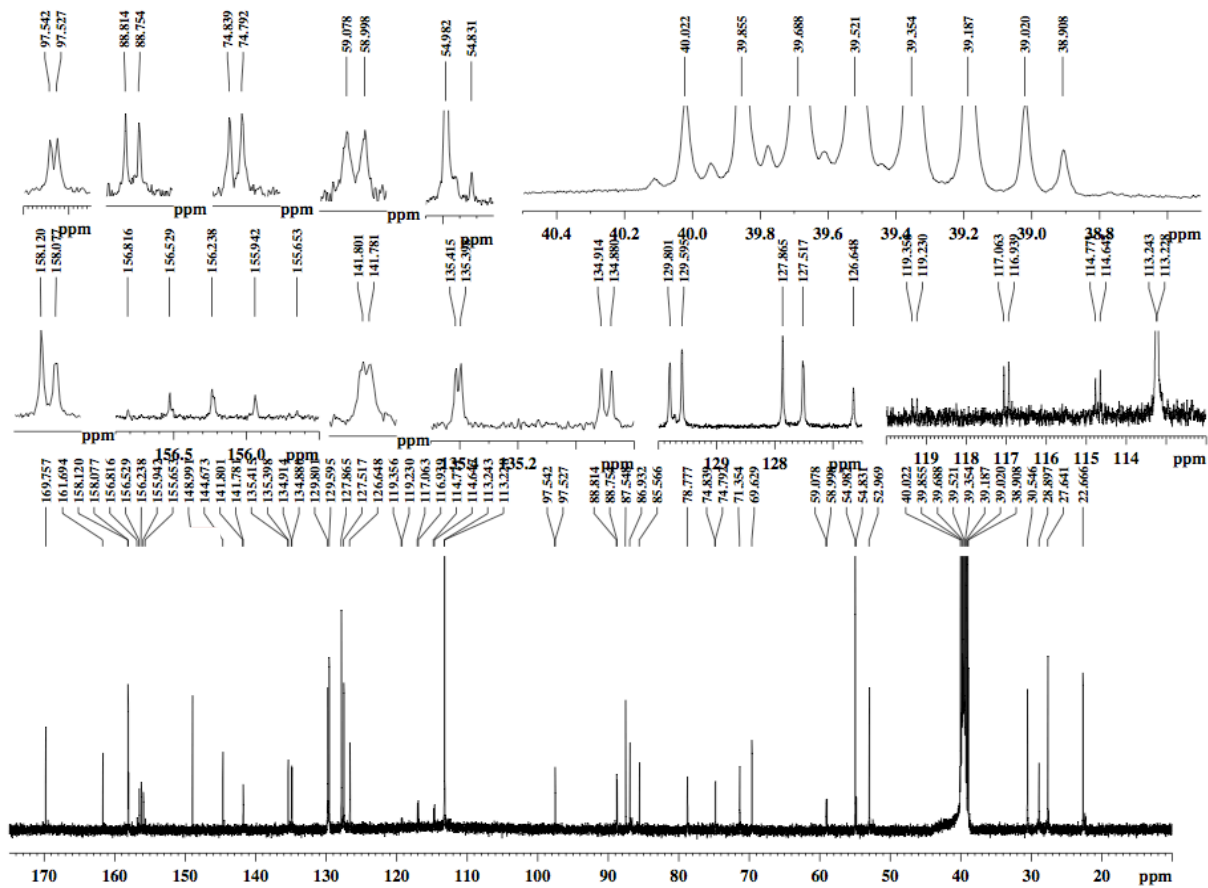

COSY

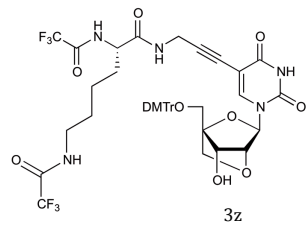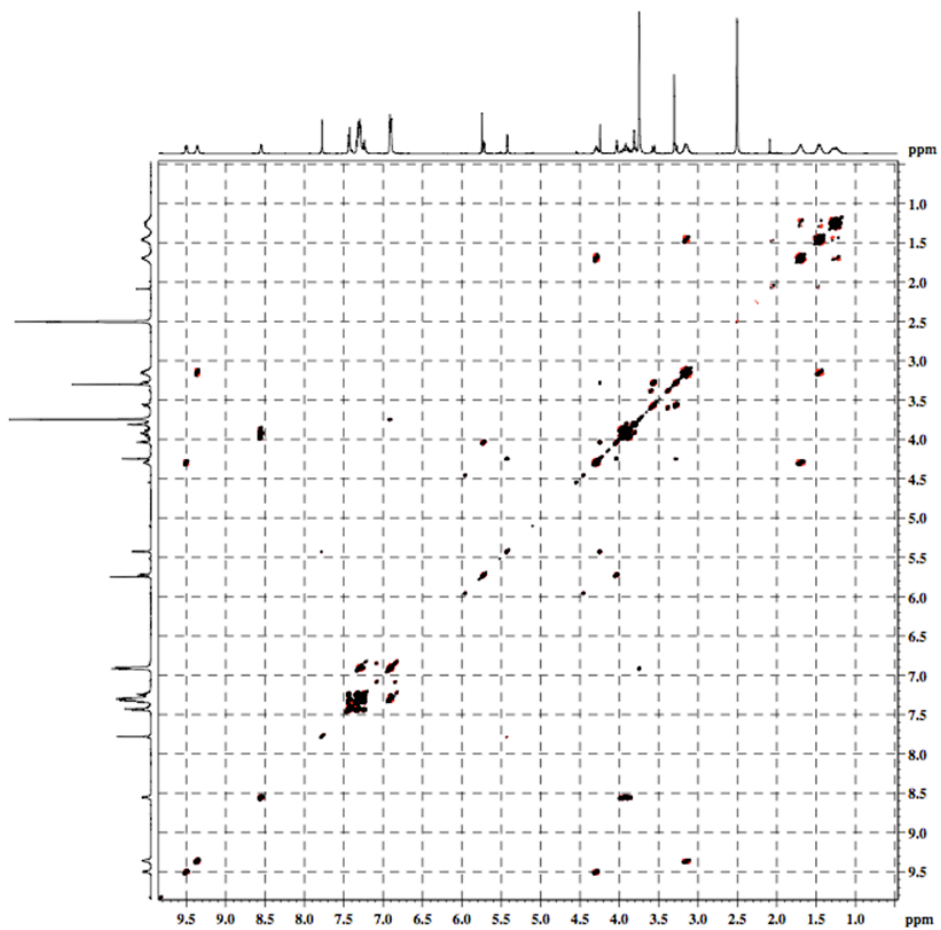

DEPT

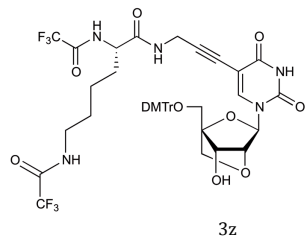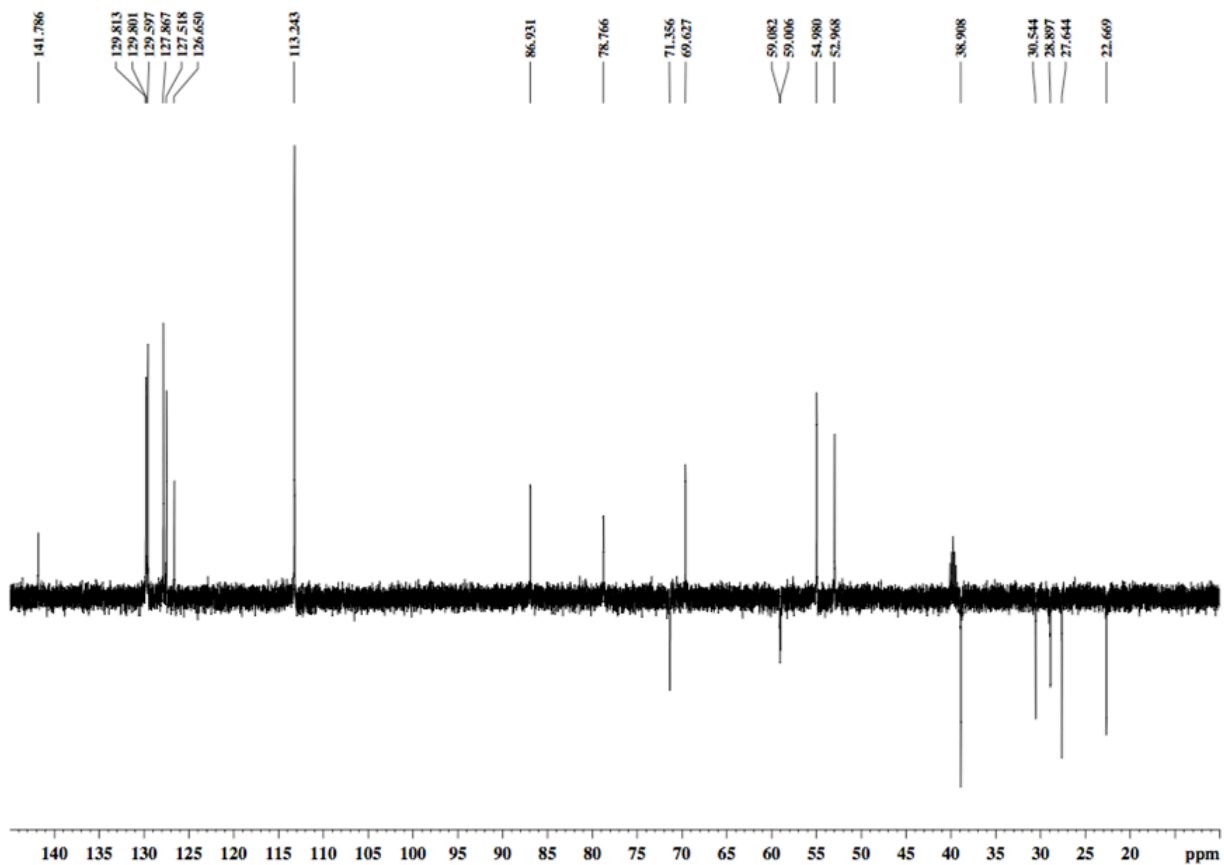

HSQC

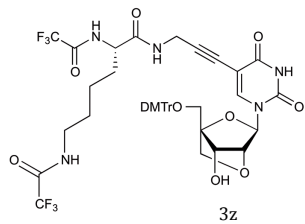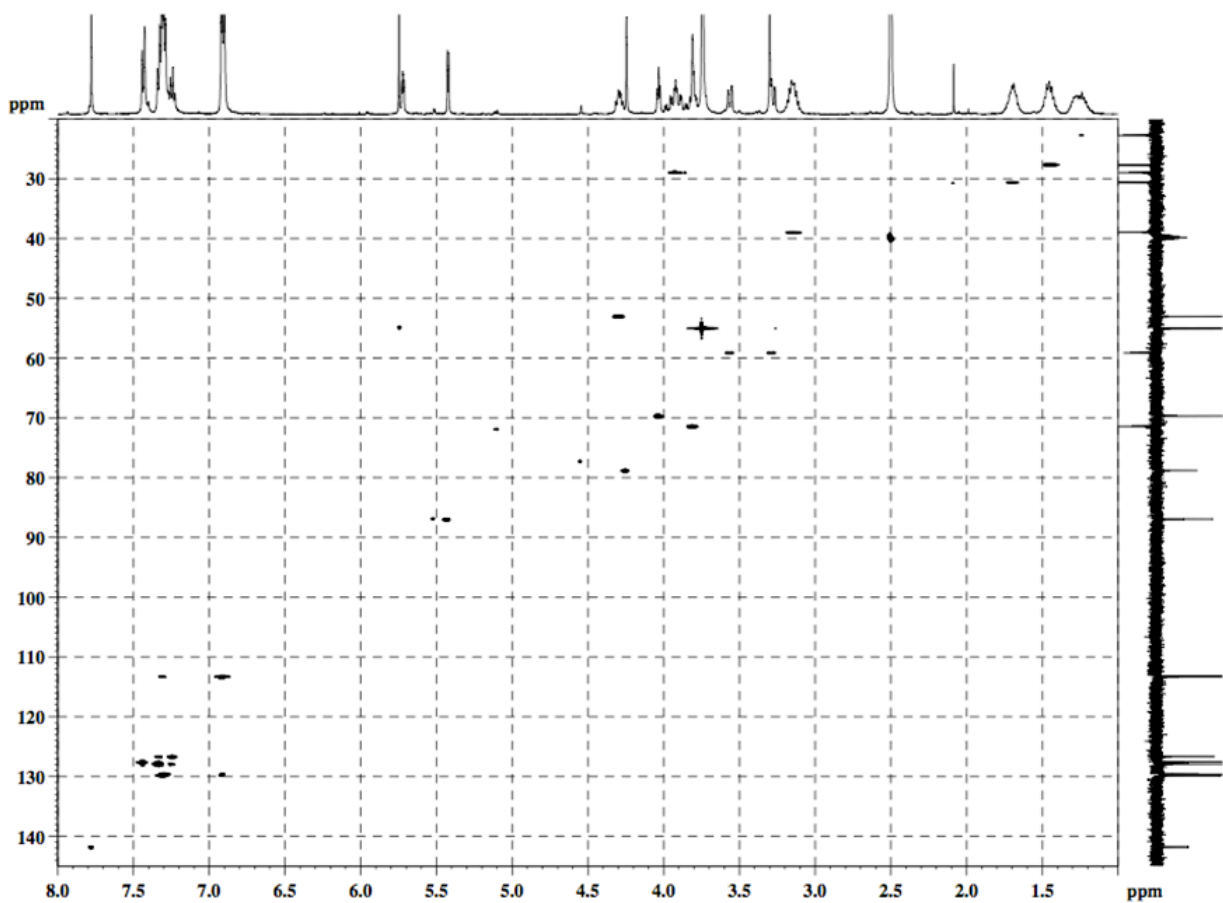

<sup>19</sup>F

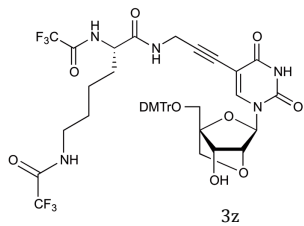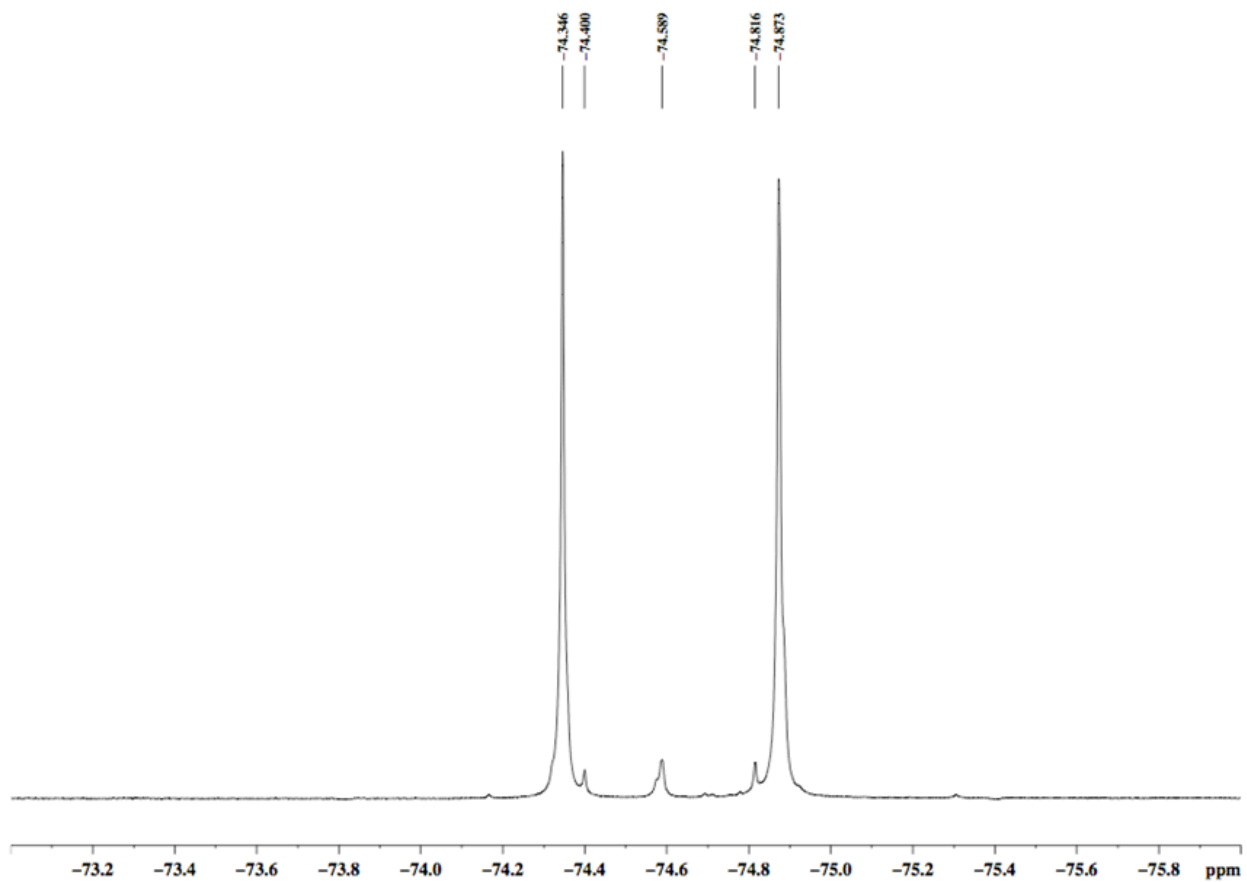

31P

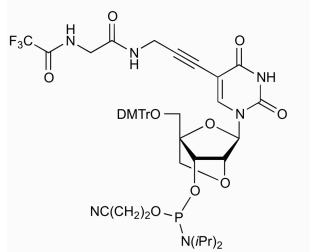

4x

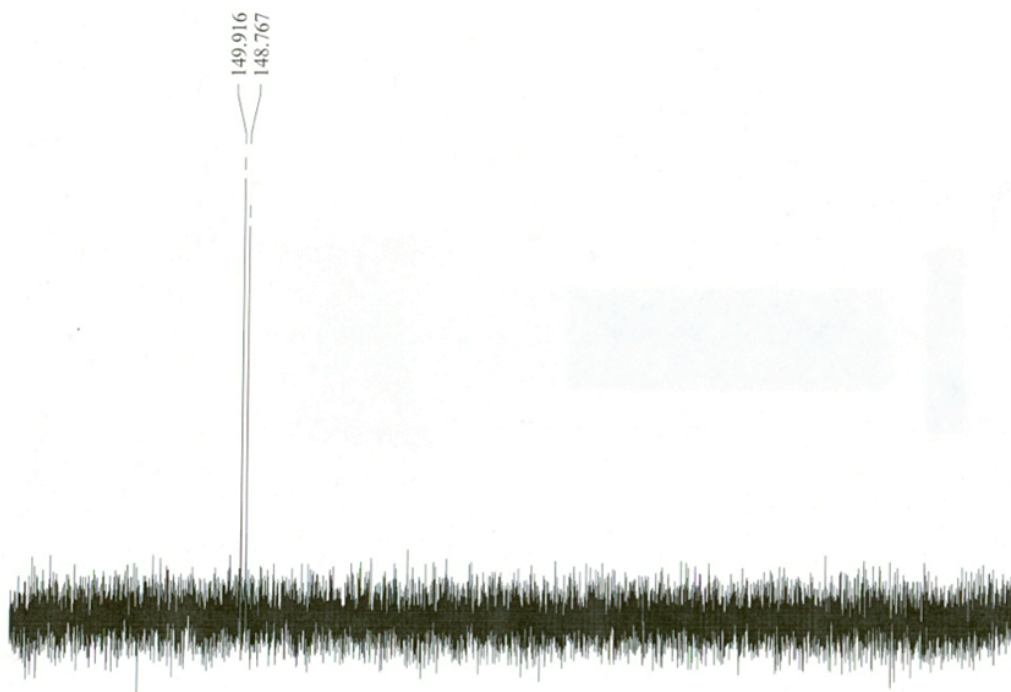



$^{31}\text{P}$

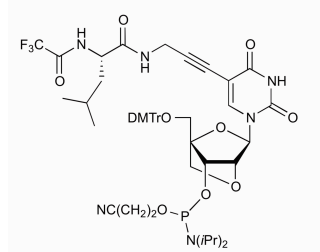

4y

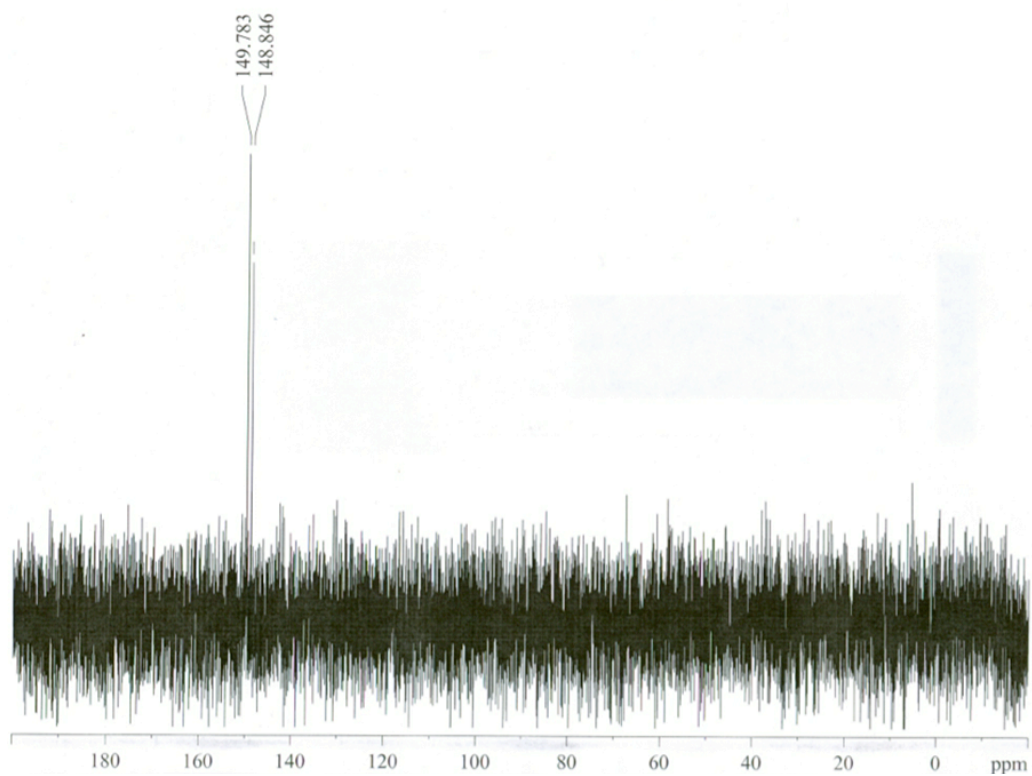

31P

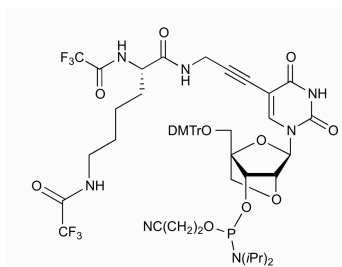

4z

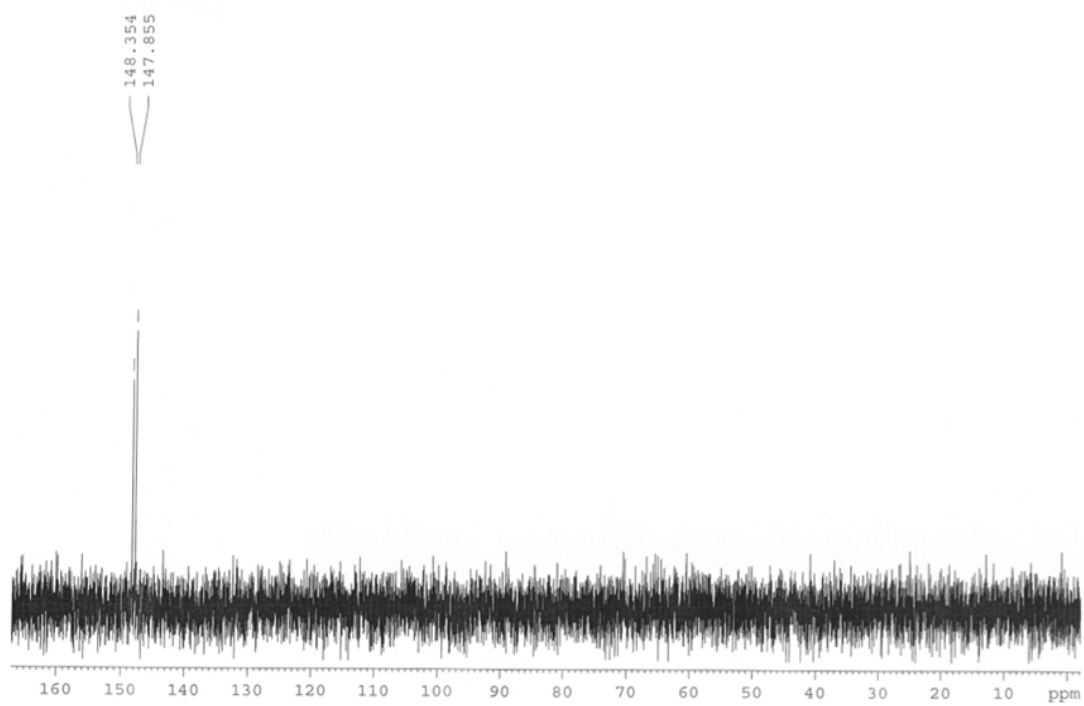

Supplement: c4cc03623a1.pdf [file c4cc03623a1.pdf]
